# Supplementary material for: Sensitive asprosin detection in clinical samples reveals serum/saliva correlation and indicates cartilage as source for serum asprosin
Source: PubMed Central journal article supplement (PMC8789892; doi:10.1038/s41598-022-05060-x), 2022-01-25

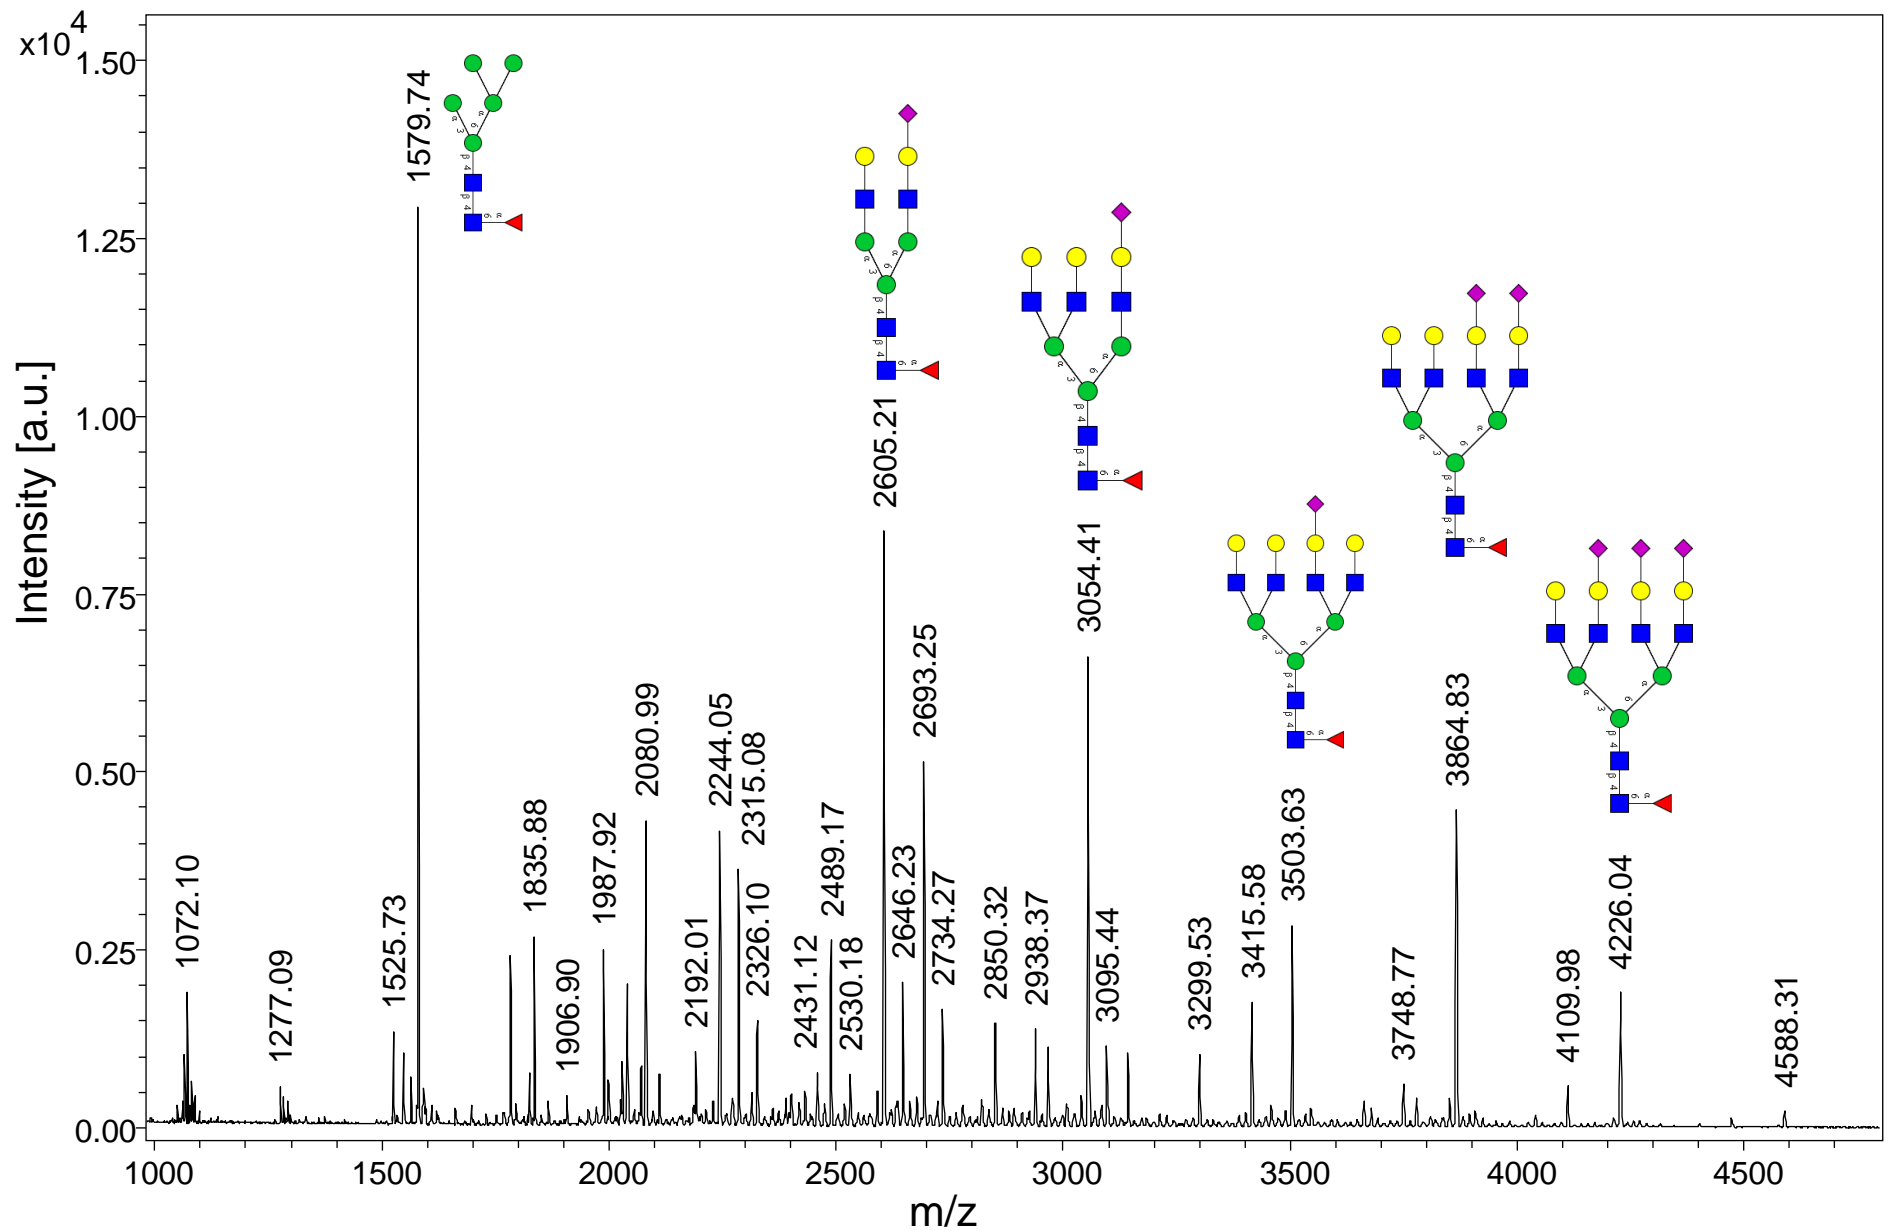

**Supplementary Figure S1: Survey MALDI mass spectrum of permethylated N-glycans from recombinant asprosin.** PNGaseF-liberated N-glycans were methylated and analyzed by positive ion reflectron MALDI mass spectrometry. The profile is characterized by dominant high-mannose N-glycan M5 and core-fucosylated complex-type N-glycans with two to four antennae. Besides fully processed species, the profile contains significant amounts of partially processed (truncated) –Gal species.

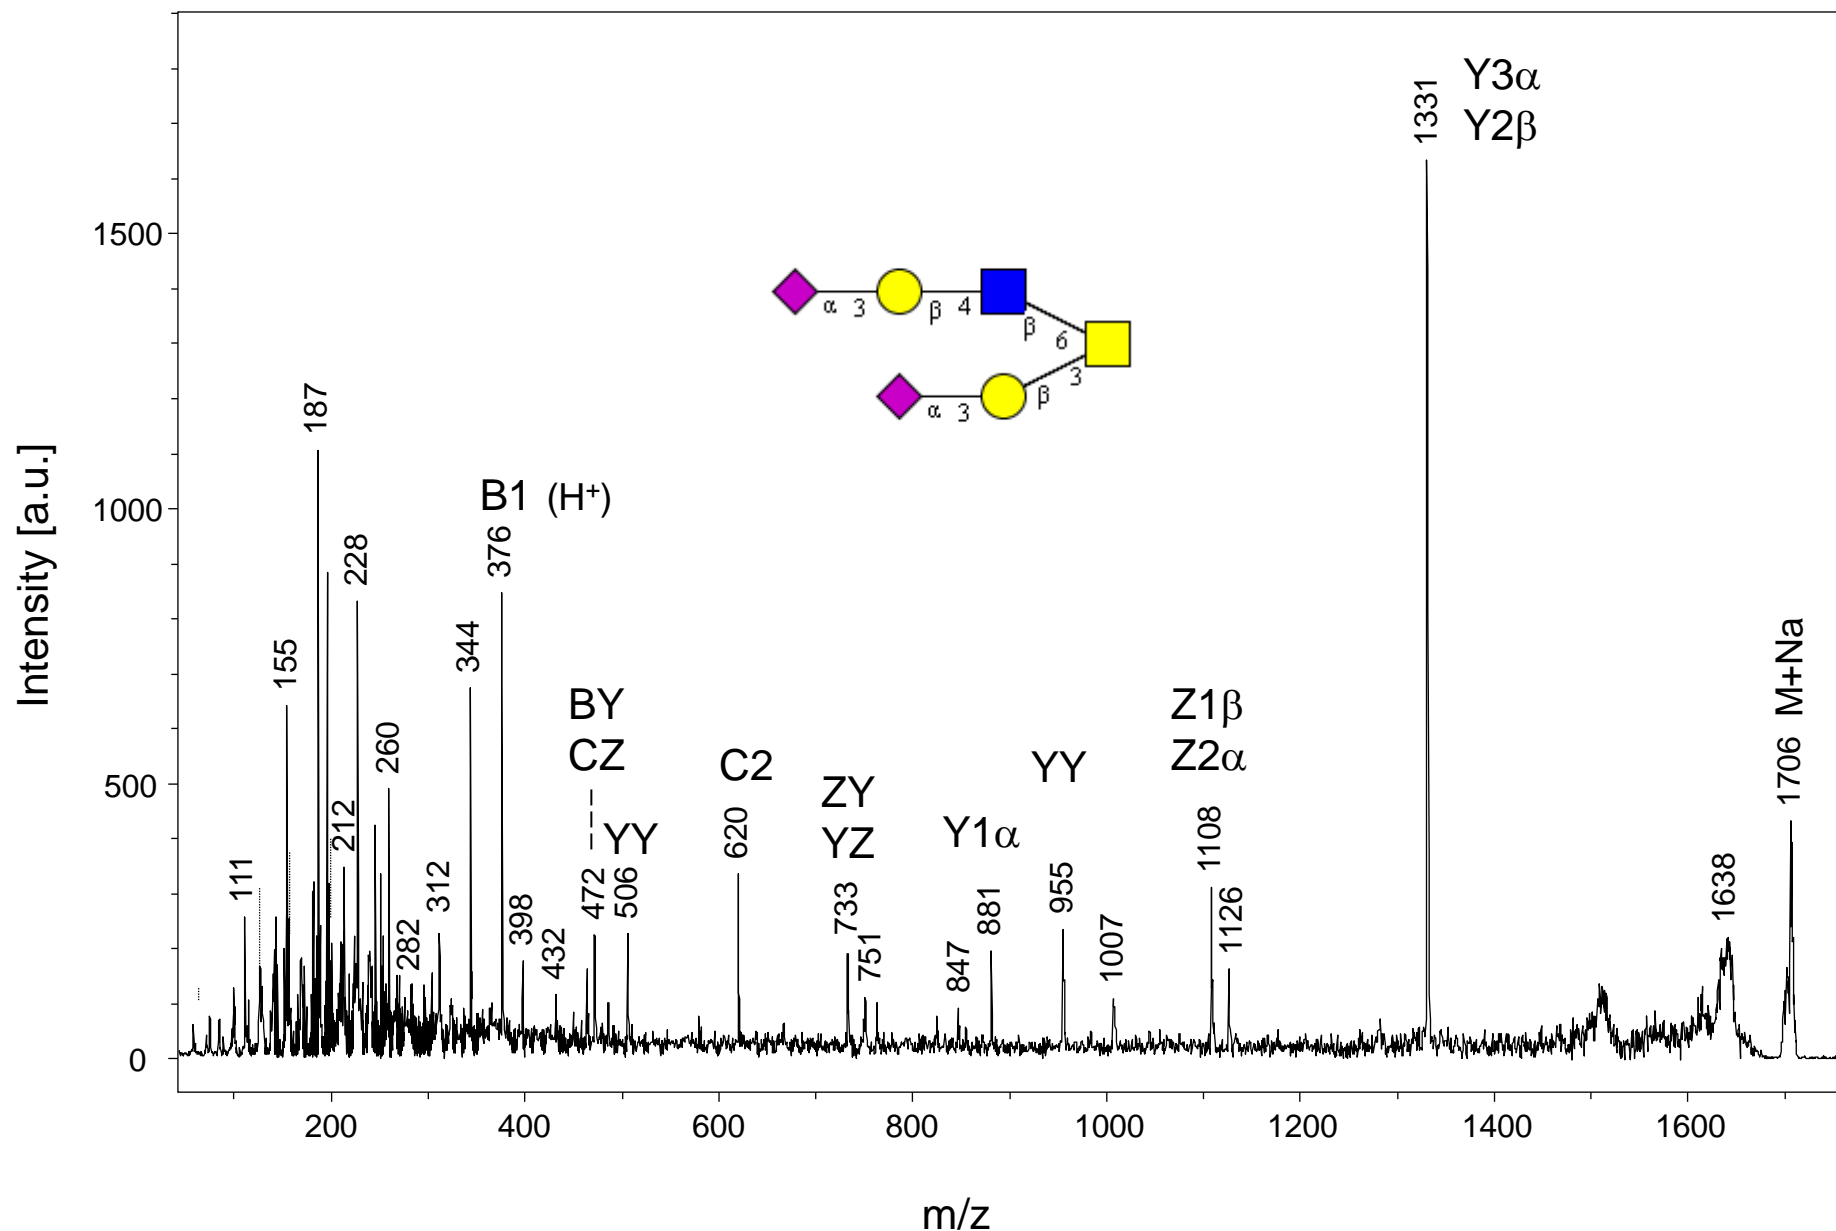

**Supplementary Figure S2: Post-Source-Decay MALDI mass spectrum of permethylated O-glycan alditol detected at precursor ion mass m/z 1706.** Only one major precursor ion was detectable in MALDI survey spectra of O-glycan alditols derived from recombinant asprosin. PSD analysis of the compound detected at m/z 1706 revealed a fragment pattern supporting a hexasaccharide (disialylated core 2 tetrasaccharide) of the structure shown.

**A**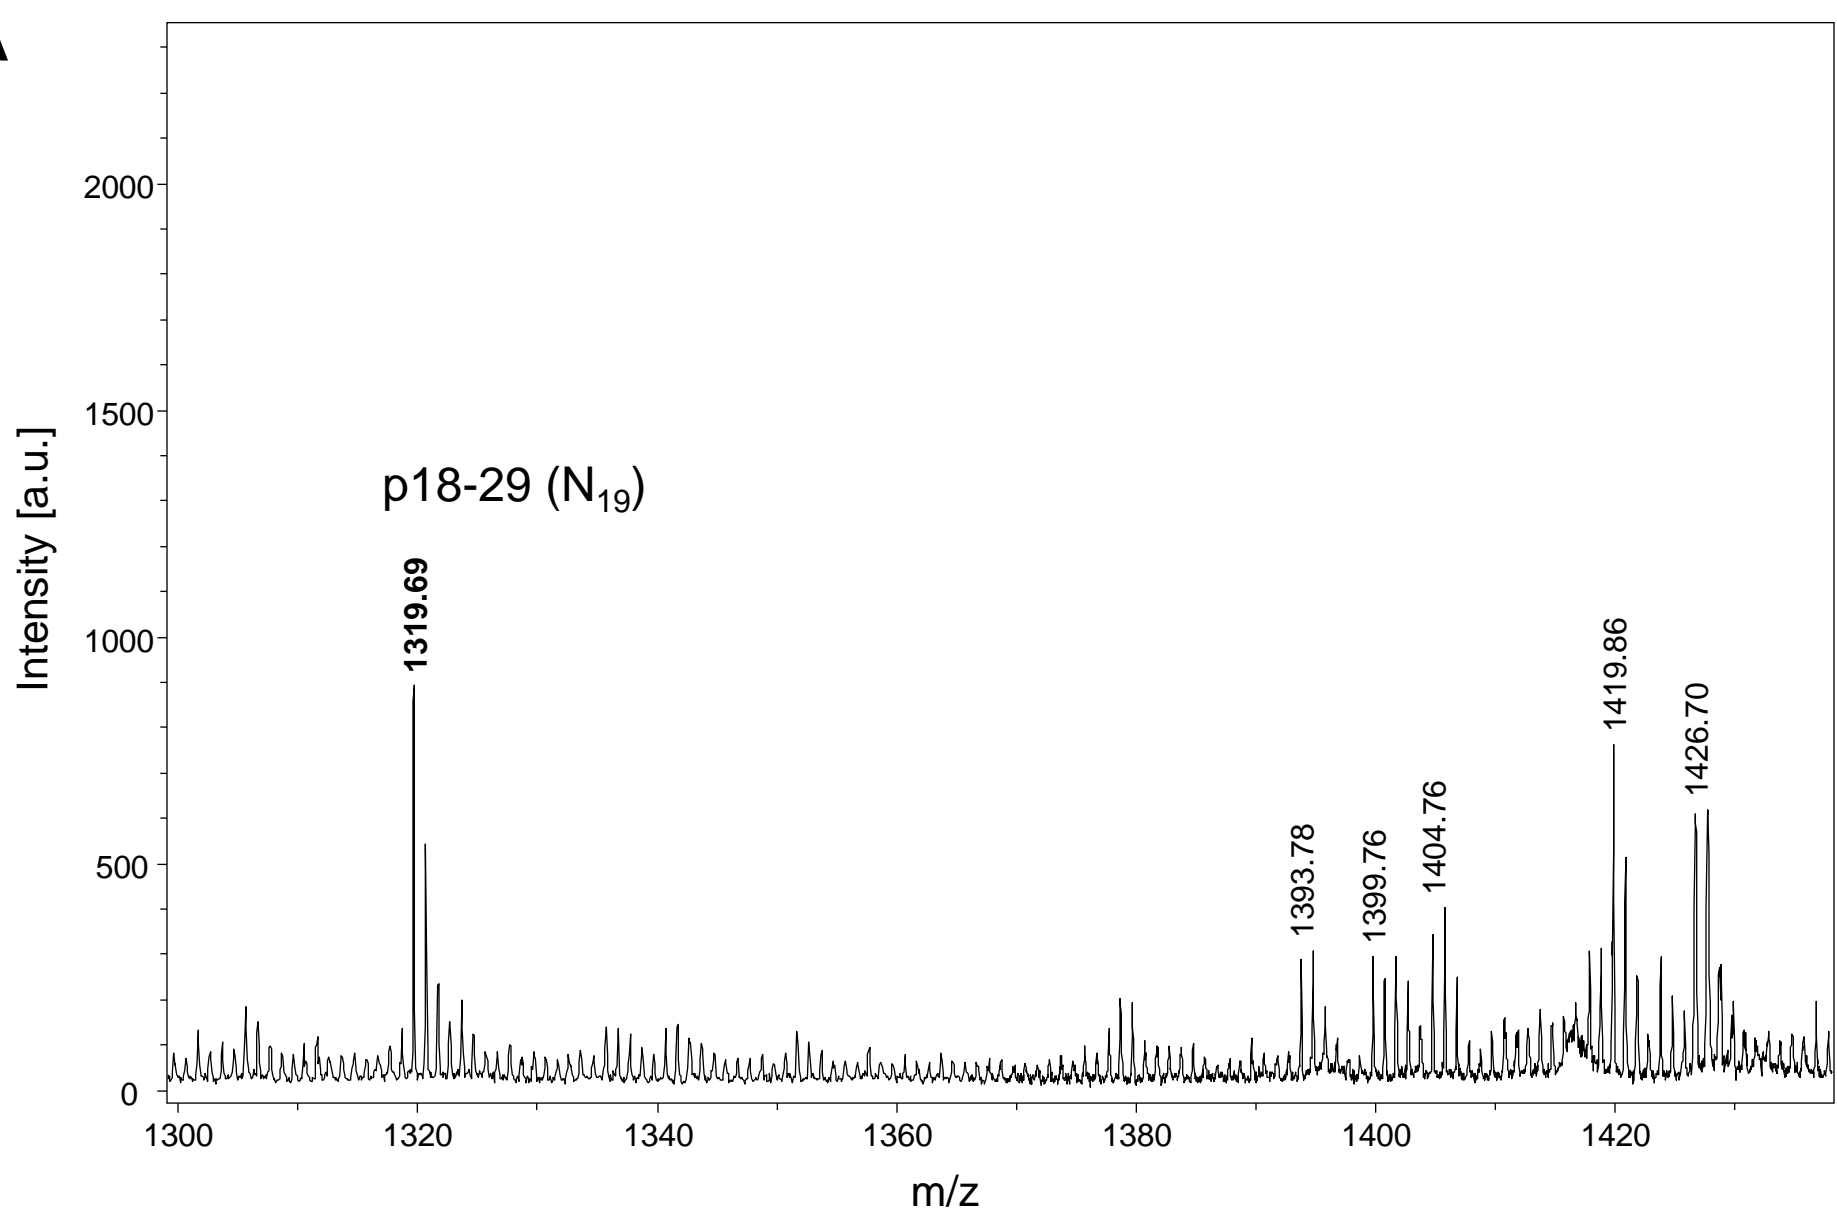**B**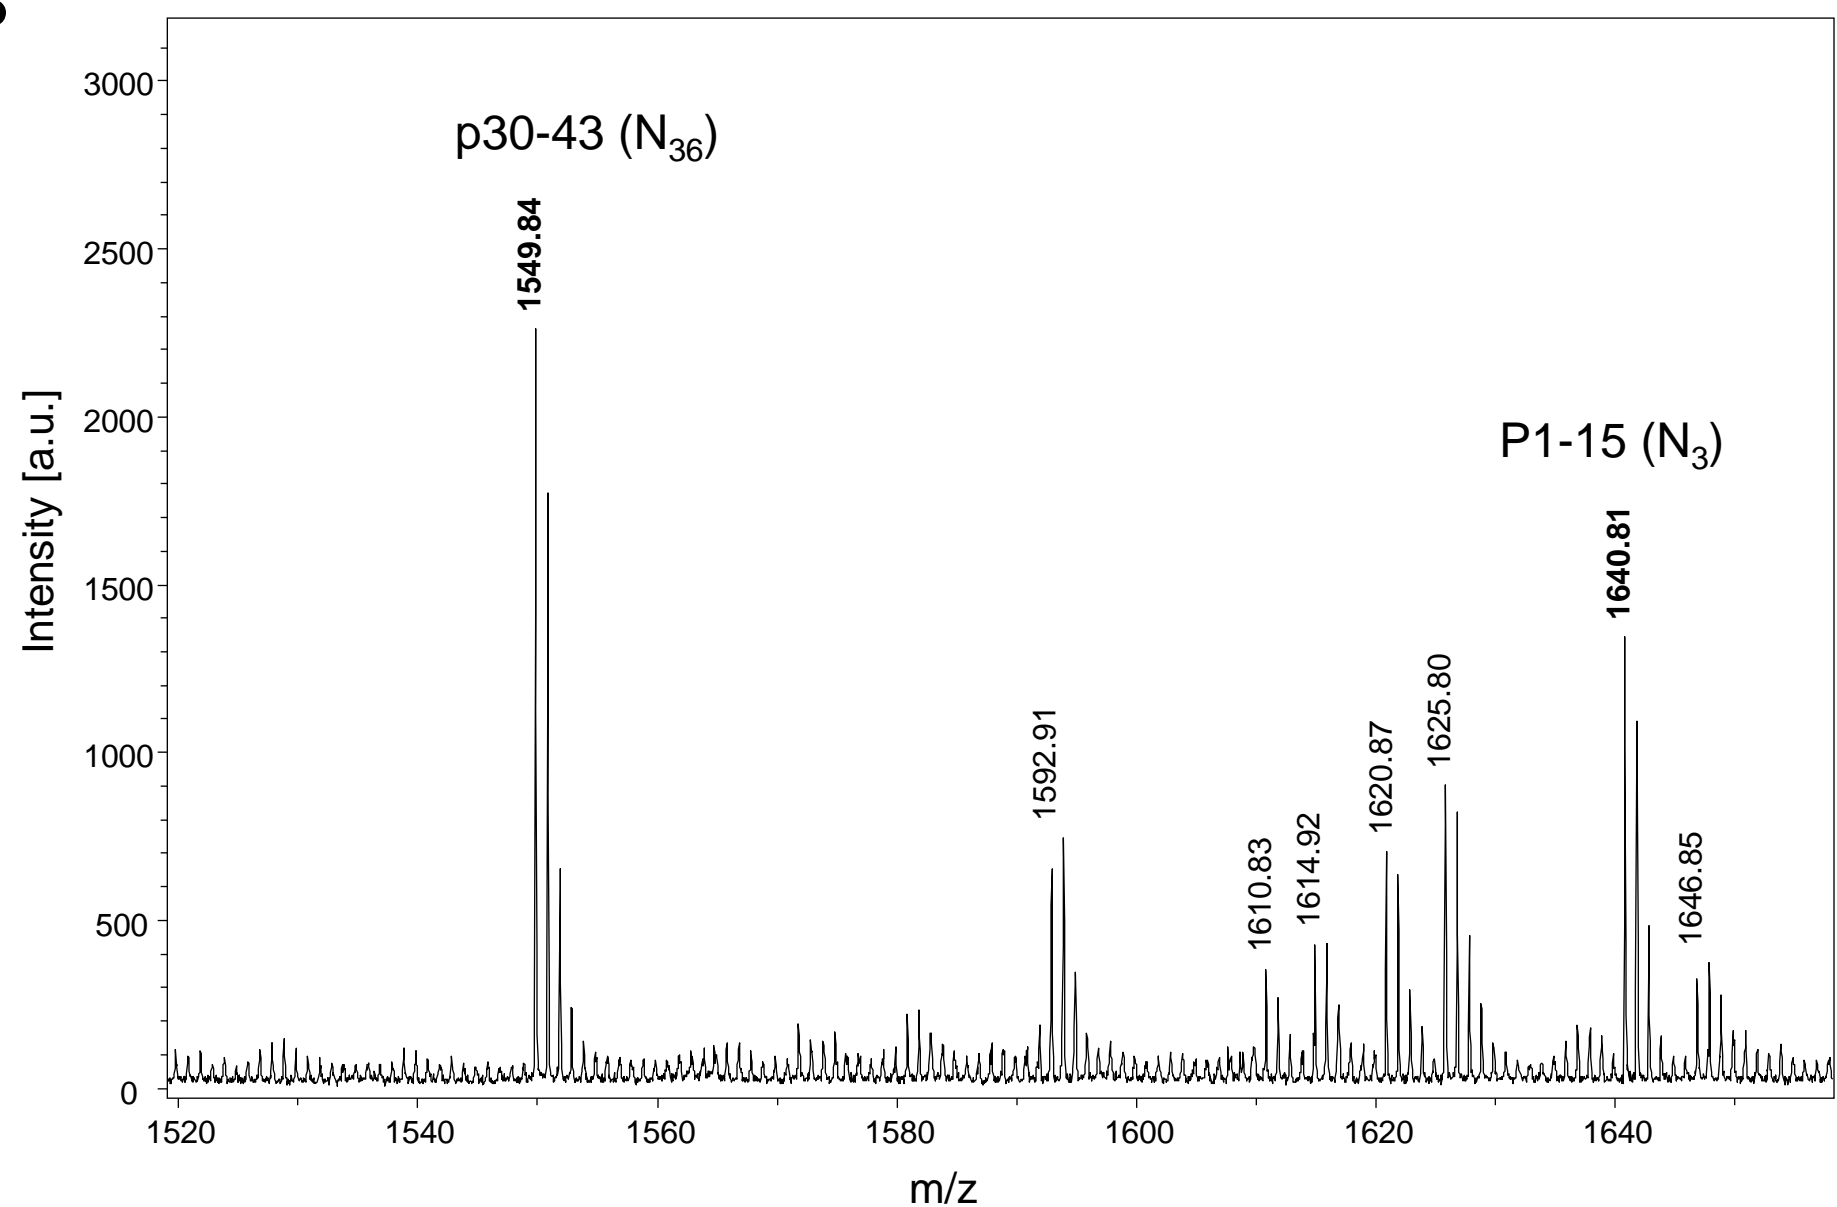

**Supplementary Figure S3: MALDI mass spectra of de-N-glycosylated peptides from recombinant asprosin after double digestion with V8 and trypsin. A.** The section shows a mass range of the spectrum from m/z 1300 to 1430 to highlight the signal at the monoisotopic mass m/z 1319.69, which corresponds to the native peptide mass m/z 1318.66 of p18-29 (ANVSLASWDVEK). The observed mass shift of +1 results from conversion of Asn to Asp during enzymatic liberation of N-linked glycans. **B.** The section shows a mass range of the spectrum from m/z 1520 to 1650 to highlight the signals at the monoisotopic masses m/z 1549.84 and 1640.81, which correspond to the native peptide masses m/z 1548.82 of p30-43 (TAIFAFNISHVSNK) and m/z 1639.66 of p1-15 (STNETDASNIEDQSE). The observed mass shift of +1 results from conversion of Asn to Asp during enzymatic liberation of N-linked glycans.

**A**

linear range of asprosin sandwich ELISA

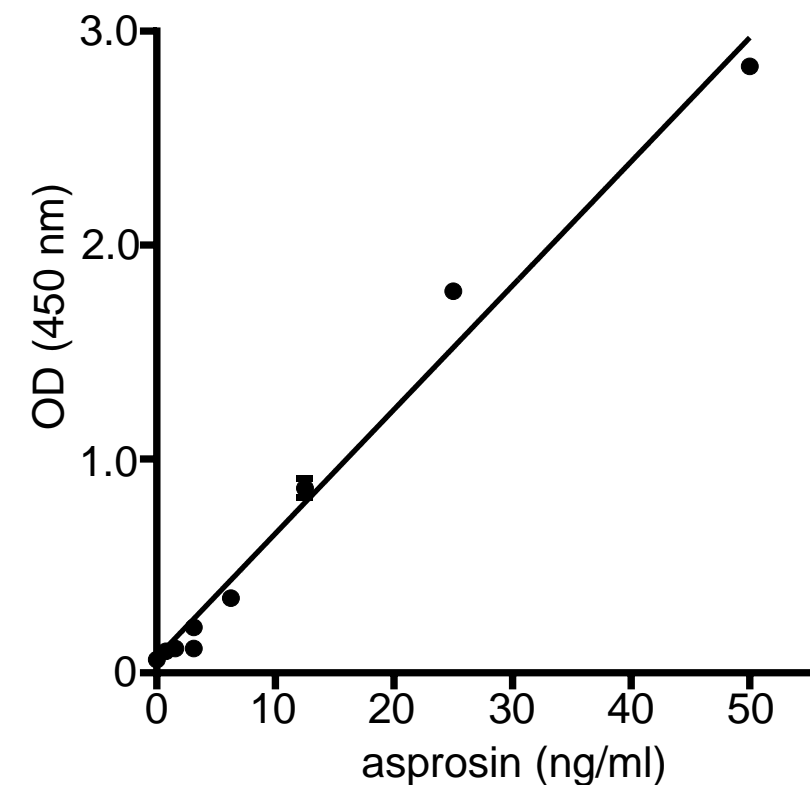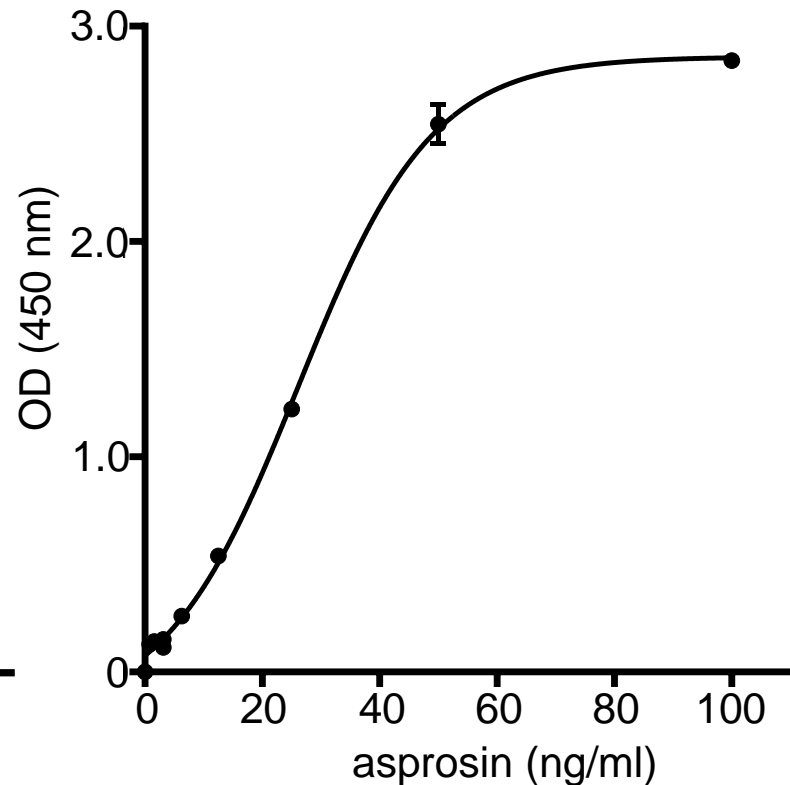**B**

sandwich ELISA sensitivity depending on capture pc-asp coating concentration

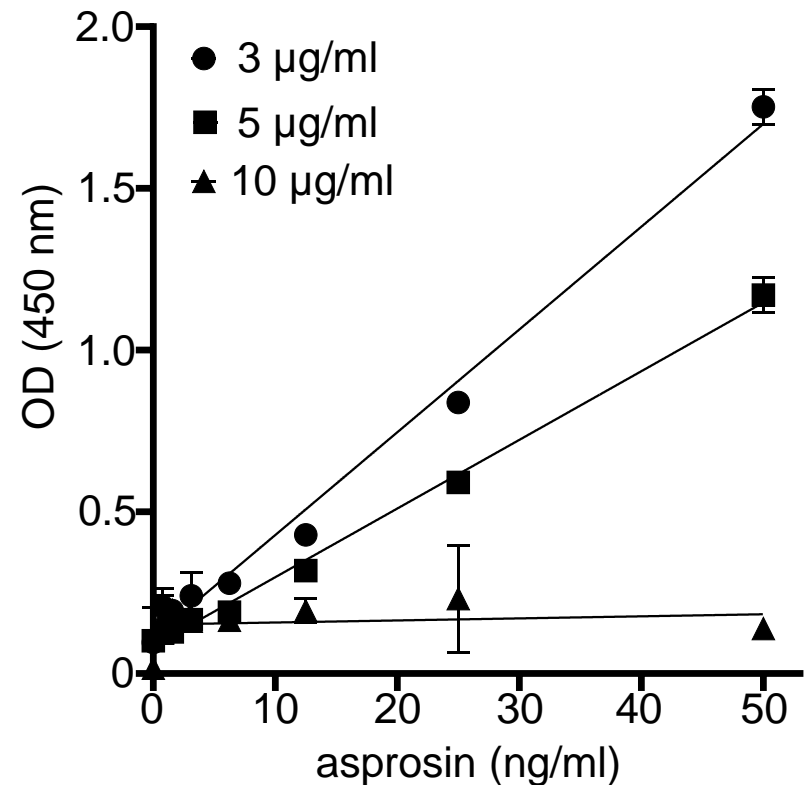

**Supplementary Figure S4: Critical parameters of established asprosin sandwich ELISA.** **A.** Linear range of asprosin sandwich ELISA was determined to be between 0 – 50 ng/ml. **B.** Concentration of coated capture antibody (pc-asp) affects sensitivity of asprosin sandwich ELISA. Data were analyzed using Graphpad Prism version 8.0.2.

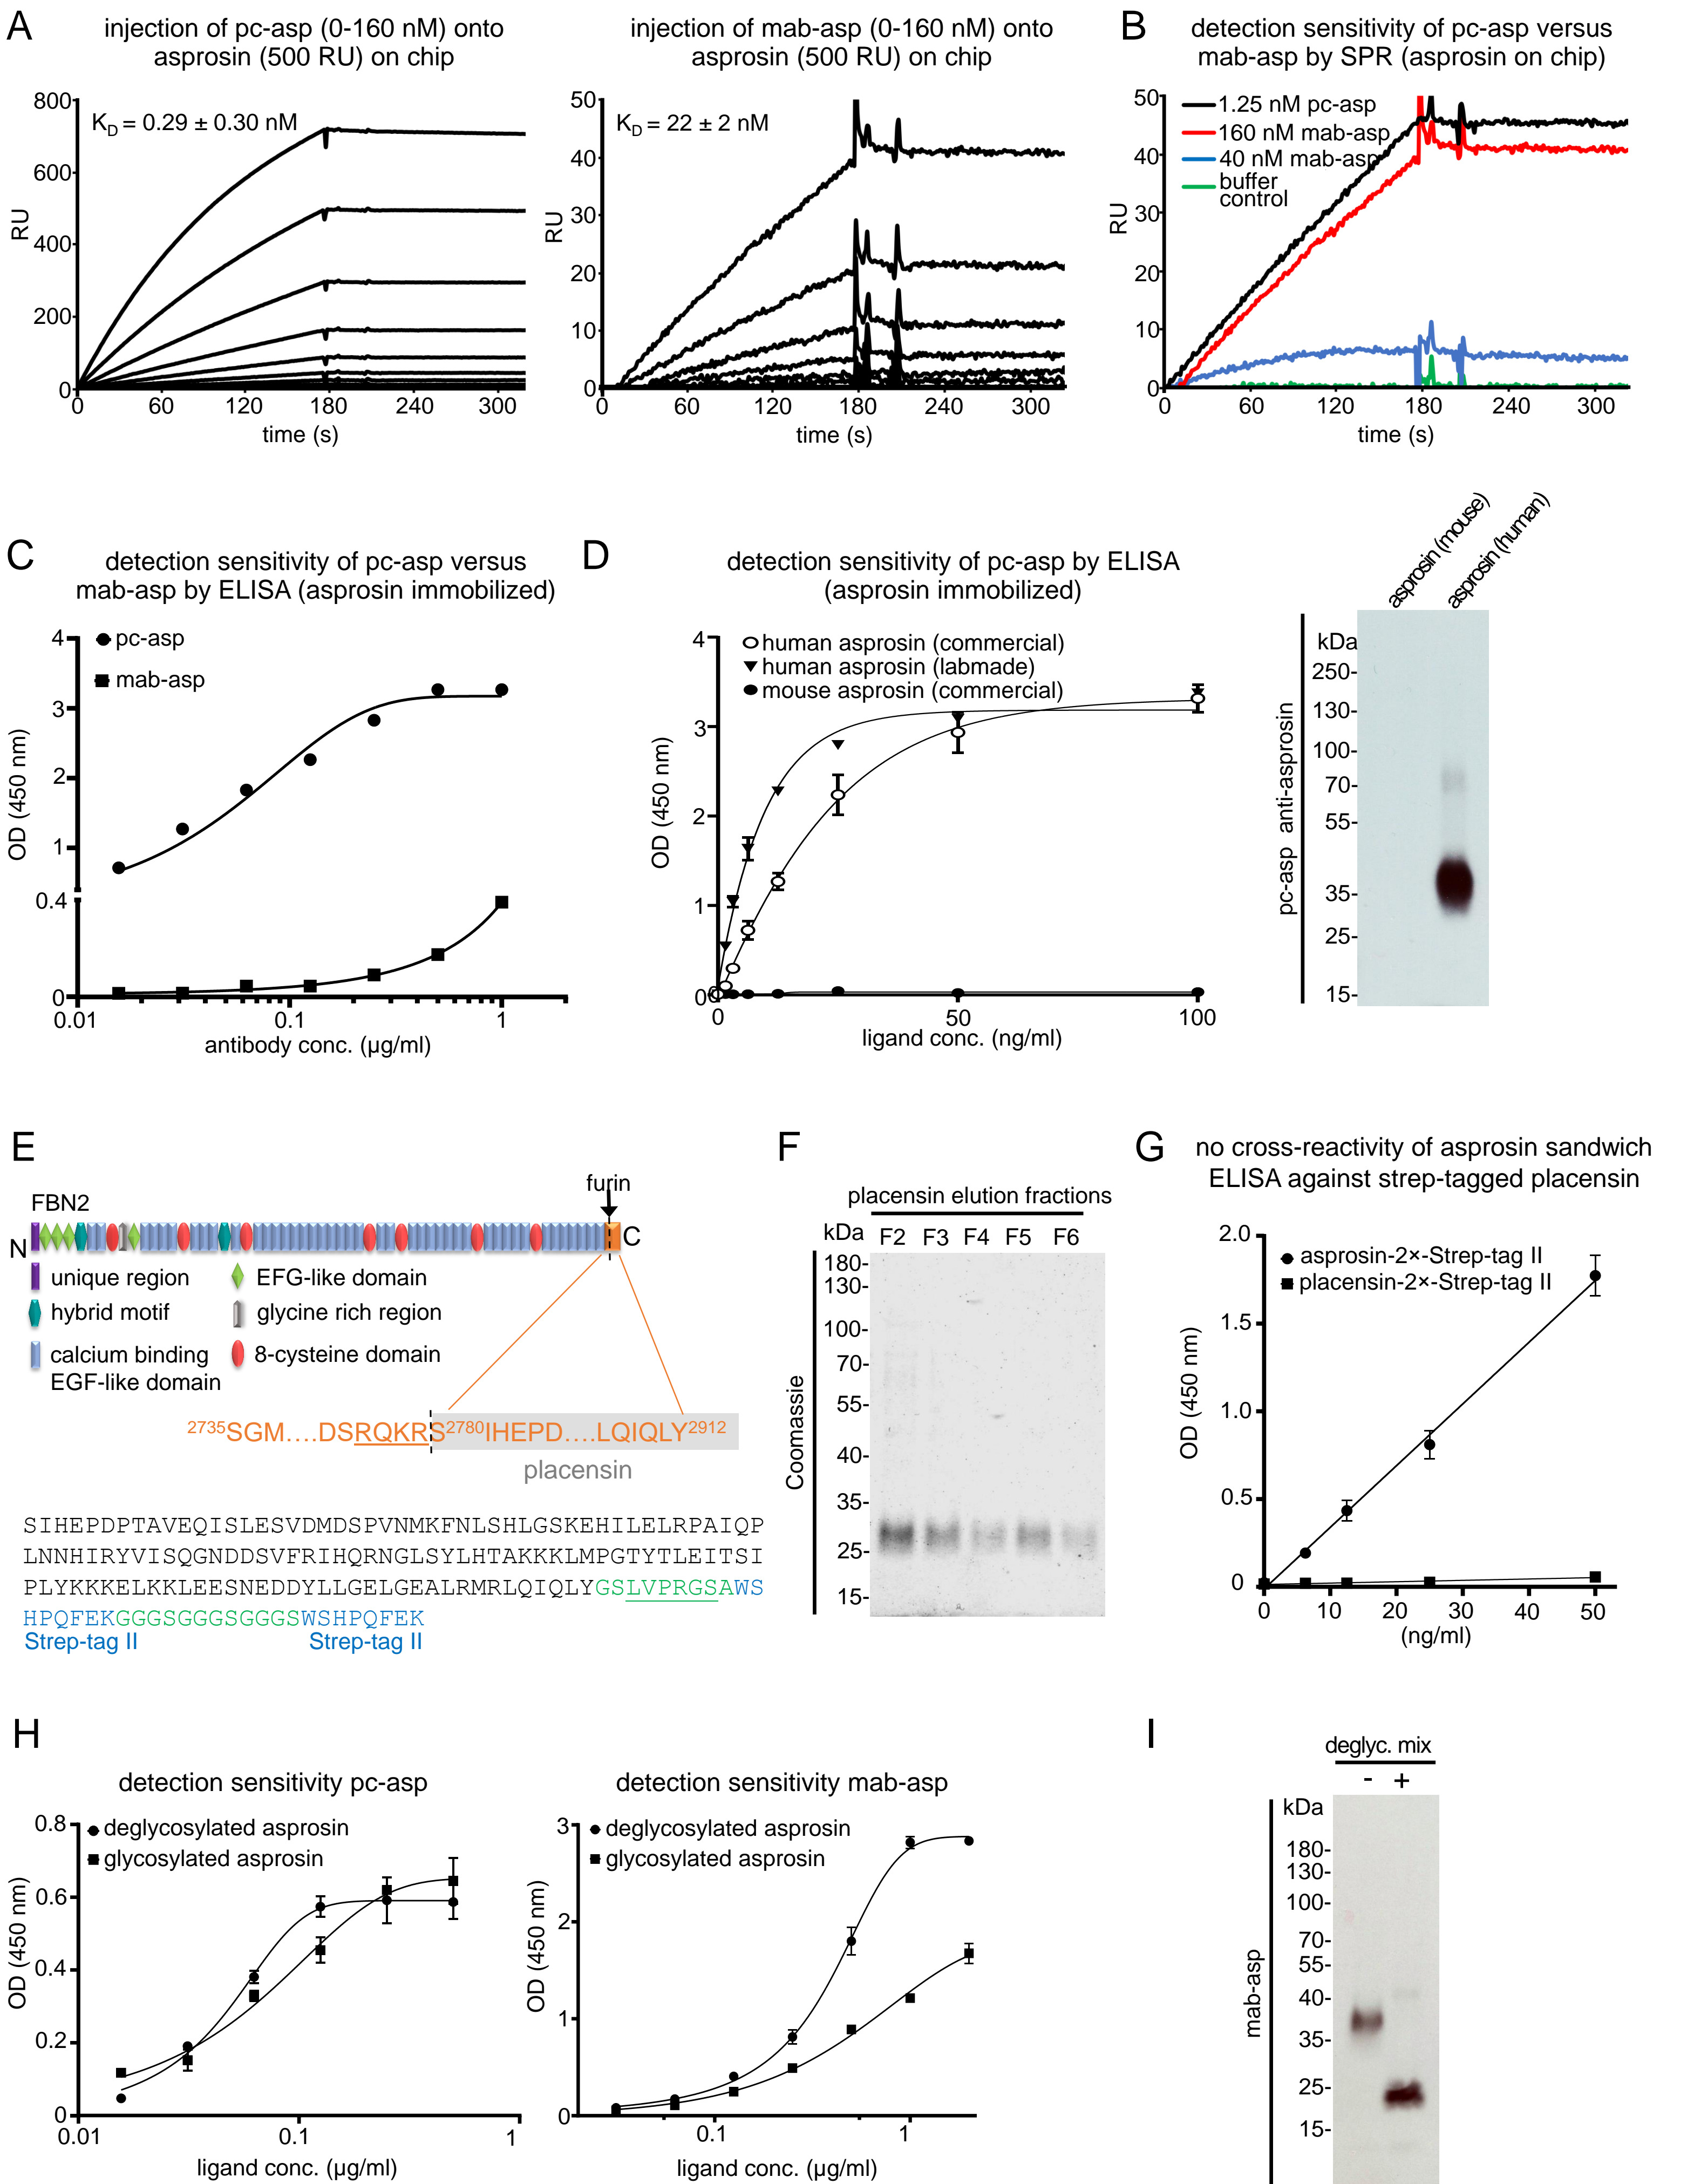

**Supplementary Figure S5: Affinity of pc-asp versus mab against glycosylated and deglycosylated asprosin.** **A.** Measurement of pc-asp and mab-asp affinity by SPR. Sensorgrams of injections of 2-fold serial dilutions (0-160 nM) of (left) pc-asp and (right) mab antibodies onto asprosin immobilized on chip. The calculated affinity ( $K_D$ ) of pc-asp was  $0.29 \pm 0.3$  nM and mab was  $22 \pm 2$  nM. **B.** Sensorgrams showing higher sensitivity of pc-asp (1.25 nM) compared to mab (160 nM) to immobilized asprosin on chip. **C.** pc-asp shows a higher sensitivity against immobilized human asprosin (purchased from Biolegend, #761902) versus mab. **D.** (left) pc-asp antibody showed high specificity to human asprosin and no cross reactivity to mouse asprosin in direct ELISA assay and western blot analysis (right). **E.** (top) Domain structure of fibrillin-2 and and sequence of its C-terminal propeptide, placensin (marked in grey). Placensin consists of 133 amino acids (S<sup>2780</sup>-Y<sup>2912</sup>) after furin cleavage from pro-fibrillin-2 (position of furin cleavage site within domain structure is marked by arrow, furin cleavage site is underlined). (bottom) Placensin sequence with a C-terminally placed double Strep-tag II which was overexpressed in HEK293 cells. Residues representing linker regions are indicated in green, thrombin cleavage (LVPRGS) site is underlined, and Strep-tag II sequences are marked in blue. **F.** Coomassie stained quality control gel of eluted fractions (F2-F6) of human placensin after affinity chromatography. **G.** Specific detection of recombinantly expressed asprosin containing a C-terminally placed double Strep-tag II by asprosin sandwich ELISA. No crossreactivity to recombinantly expressed double strep-tagged placensin was observed by asprosin sandwich ELISA. **H.** Sensitivity of pc-asp and mab to glycosylated and deglycosylated asprosin using direct ELISA. (left) Pc-asp antibody shows almost equal sensitivity to immobilized glycosylated and deglycosylated asprosin. (right) mab-asp antibody shows low sensitivity to glycosylated compared to deglycosylated asprosin. **I.** Western blot with mab anti-asprosin detecting glycosylated ( $\approx 37$  kDa) and deglycosylated asprosin ( $\approx 25$  kDa). (Deglycosylation was performed with Protein Deglycosylation Mix II, P6044S, NEB, Germany). ELISA data were analyzed using Graphpad Prism version 8.0.2. Association and dissociation rates were obtained using BIAevaluation version 3.0 software. Apparent equilibrium dissociation constants ( $K_D$  values) were then calculated as the ratio of  $k_d/k_a$ .

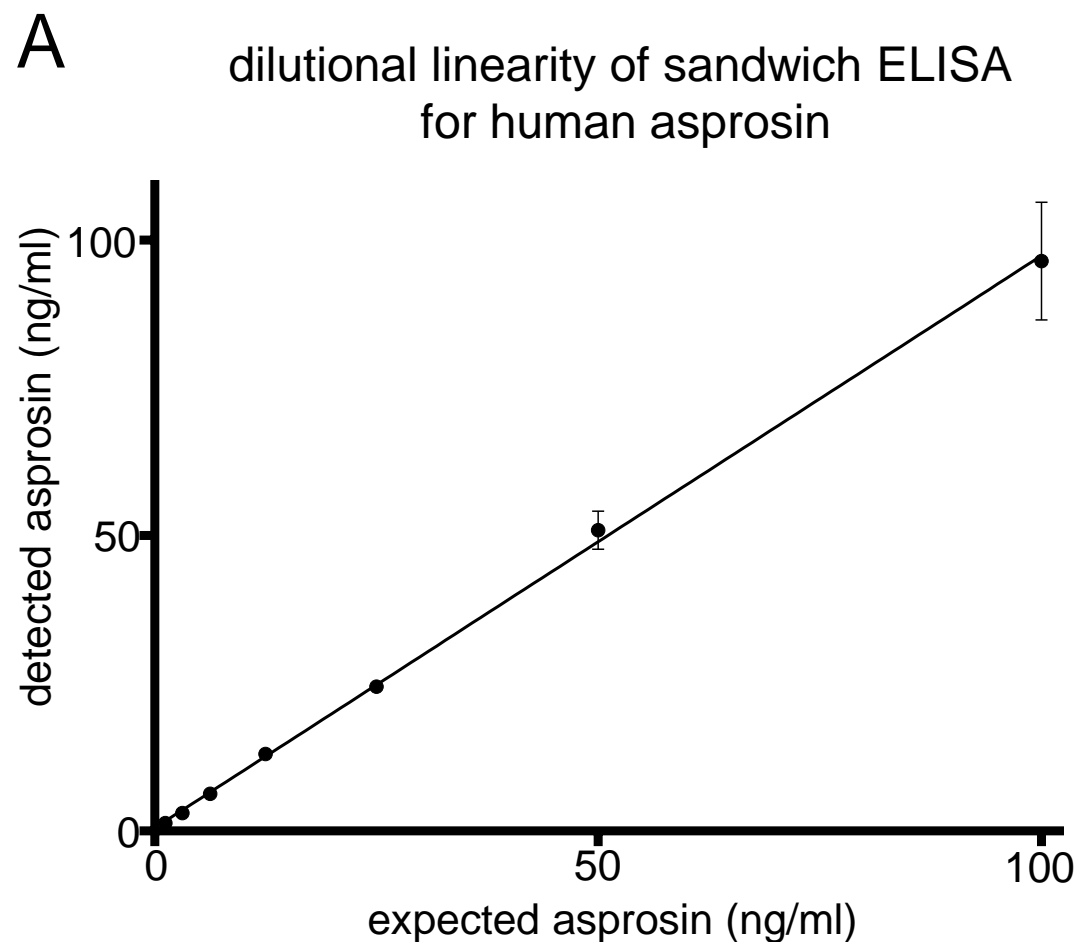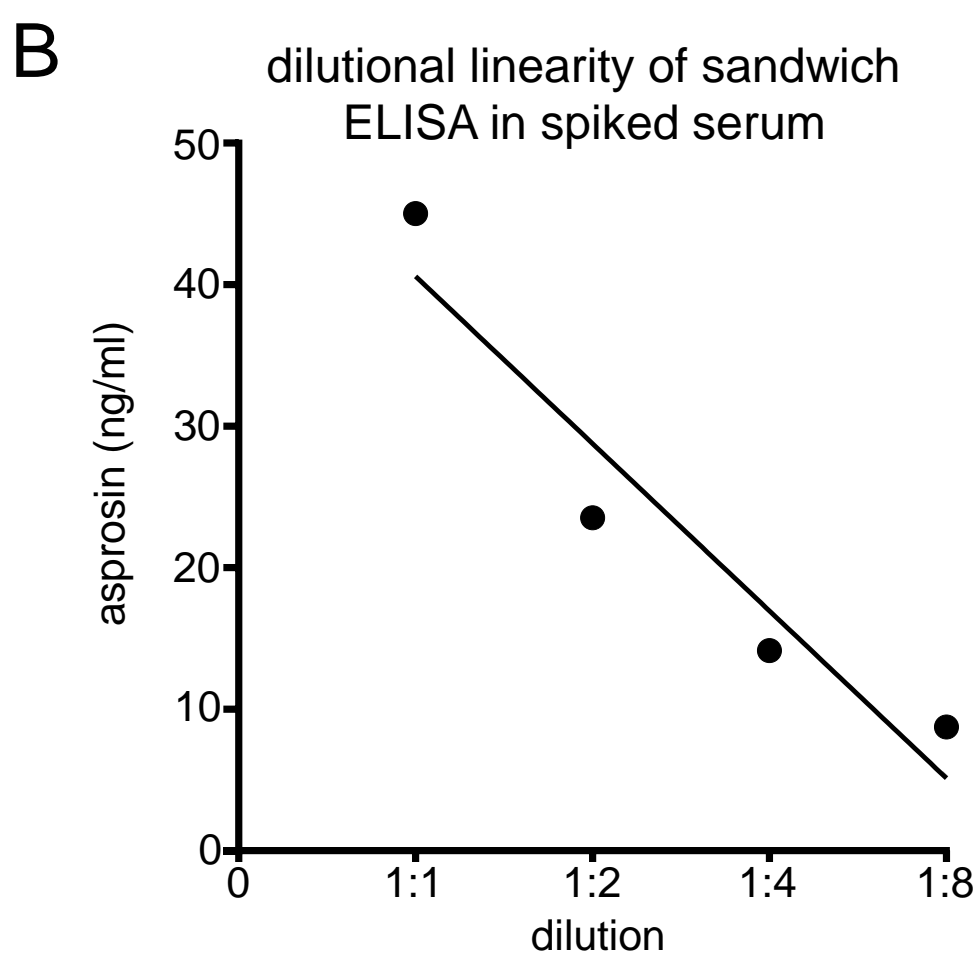

| dilution factor | expected (ng/ml) | detected (ng/ml) | recovery % |
|-----------------|------------------|------------------|------------|
| 1               | 50               | 45.02            | 90.04      |
| 2               | 25               | 23.52            | 94.08      |
| 4               | 12.5             | 14.14            | 113.12     |
| 8               | 6.25             | 7.14             | 114.34     |

**C** spike and recovery assessment of asprosin sandwich ELISA

|        | sample | expected (ng/ml) | detected (ng/ml) | recovery (%) | expected (ng/ml) | detected (ng/ml) | recovery (%) |
|--------|--------|------------------|------------------|--------------|------------------|------------------|--------------|
| plasma | 1      | 30               | 23.18            | 77.28        | 50               | 59.99            | 119.98       |
|        | 2      | 30               | 27.34            | 91.16        |                  | 45.02            | 90.04        |
|        | 3      | 30               | 30.63            | 102.11       |                  | 40.30            | 80.61        |
|        | 4      | 30               | 28.36            | 94.55        | 25               | 29.21            | 116.86       |
|        | 5      | 30               | 26.24            | 87.48        |                  | 24.08            | 96.34        |
| serum  | 1      | 30               | 28.31            | 94.39        |                  | 24.56            | 98.26        |
|        | 2      | 30               | 32.37            | 107.91       |                  |                  |              |
|        | 3      | 30               | 25.38            | 84.63        |                  |                  |              |
|        | 4      | 30               | 32.22            | 107.41       |                  |                  |              |
|        | 5      | 30               | 36.33            | 121.10       |                  |                  |              |

**Supplementary Figure S6: Linearity of dilution and spike and recovery assessment of asprosin sandwich ELISA.** **A.** Dilution of asprosin in DMEM, 10 % FCS does not affect accuracy and precision of asprosin detection, correlation of detected asprosin and expected asprosin concentrations using Spearman correlation = 0.9996. **B.** (left) Dilution of asprosin spiked serum with PBS does not affect the accuracy and precision of asprosin detection, the average recovery is 102.8 %. (right) Table showing expected and detected asprosin concentration values, in addition to estimated asprosin recovery. **C.** (left) Investigation of matrix effect on asprosin detection by using spiking asprosin in various serum and plasma samples, showing average recovery 96.8%. (right) Assessment of spiked asprosin recovery in serum samples before and after 1:2 dilution. Data were analyzed using Graphpad Prism version 8.0.2.



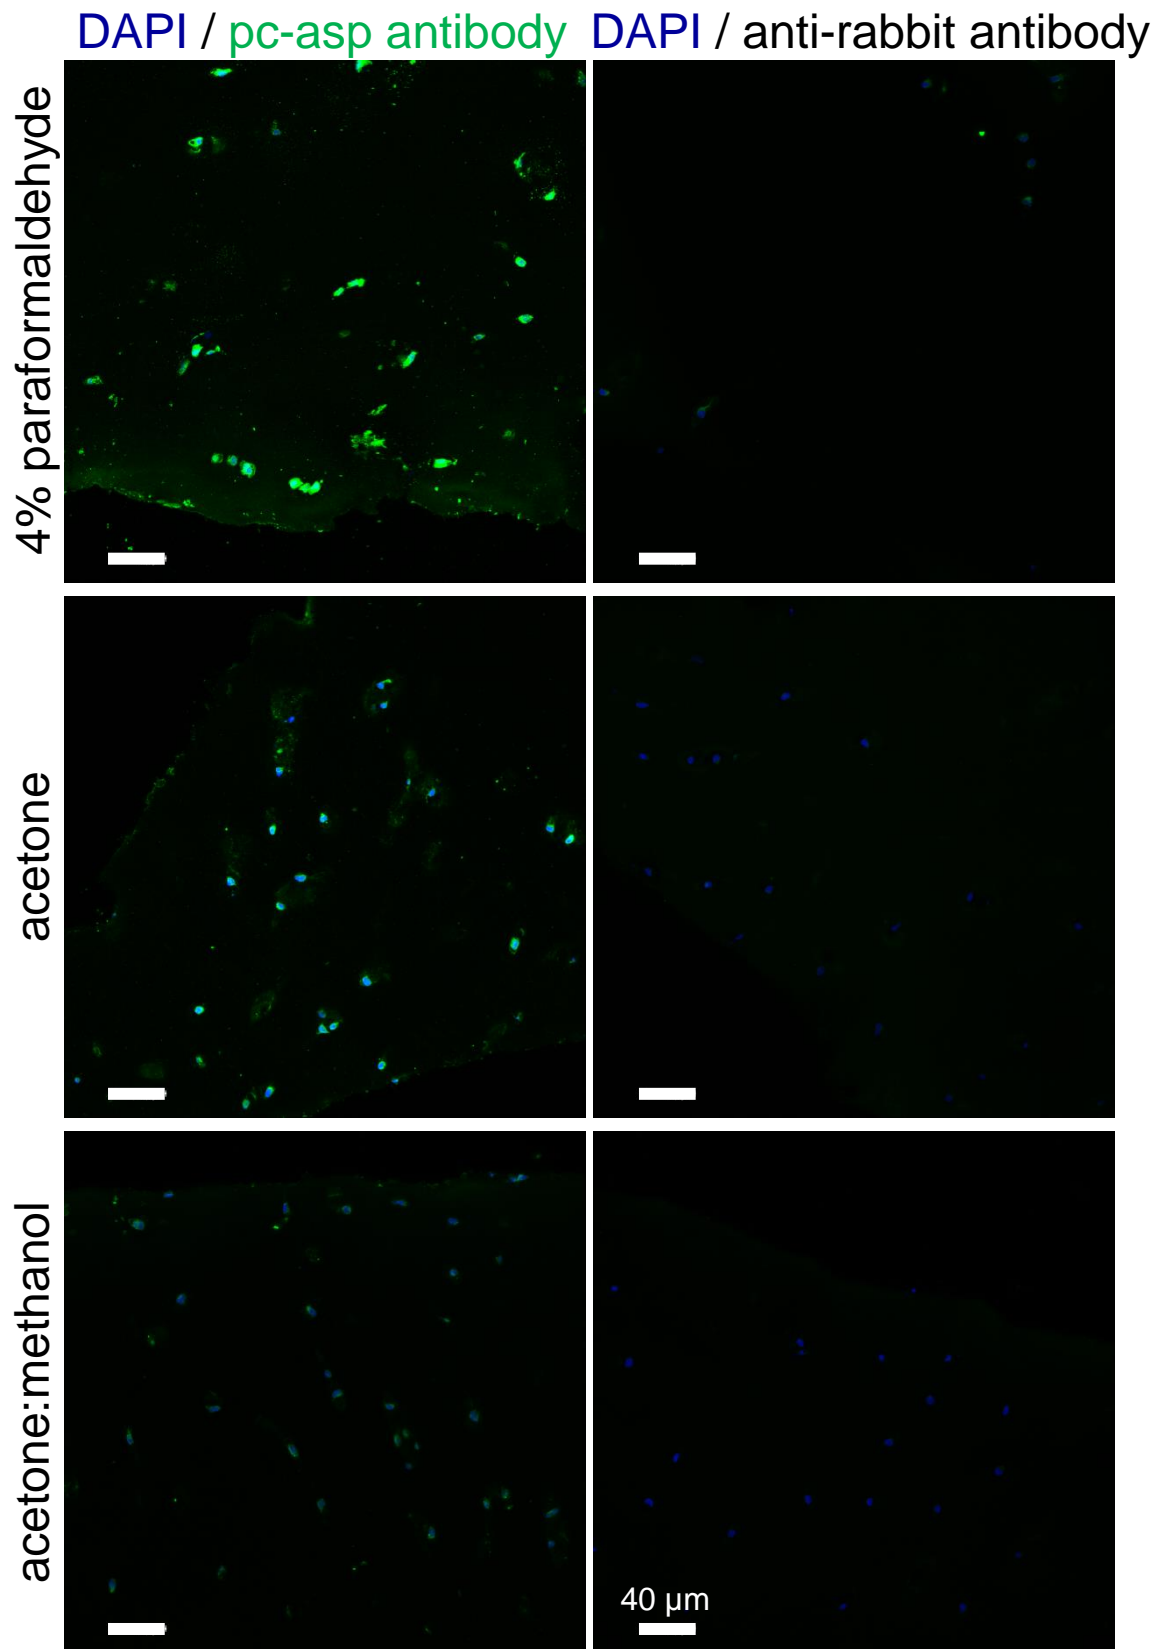

**Supplementary Figure S7: Effect of fixation and treatments on asprosin recognition by immunostaining in human cartilage.**

Immunodetection of asprosin in human chondrocytes *in situ*. Cryosections from cartilage specimen (top row) were fixed with 4% paraformaldehyde, (middle row) treated with acetone, or (bottom row) fixed with acetone:methanol mixture. The left images showed sections incubated with pc-asp asprosin antibody (green) and DAPI (blue). The right images showed sections incubated only with secondary antibody (control) and DAPI. Confocal images were obtained from a Leica SP8 confocal microscope and Leica LAS AF Lite 4.0 software. Images were further processed using Fiji/ImageJ software to obtain average intensity Z-projection.

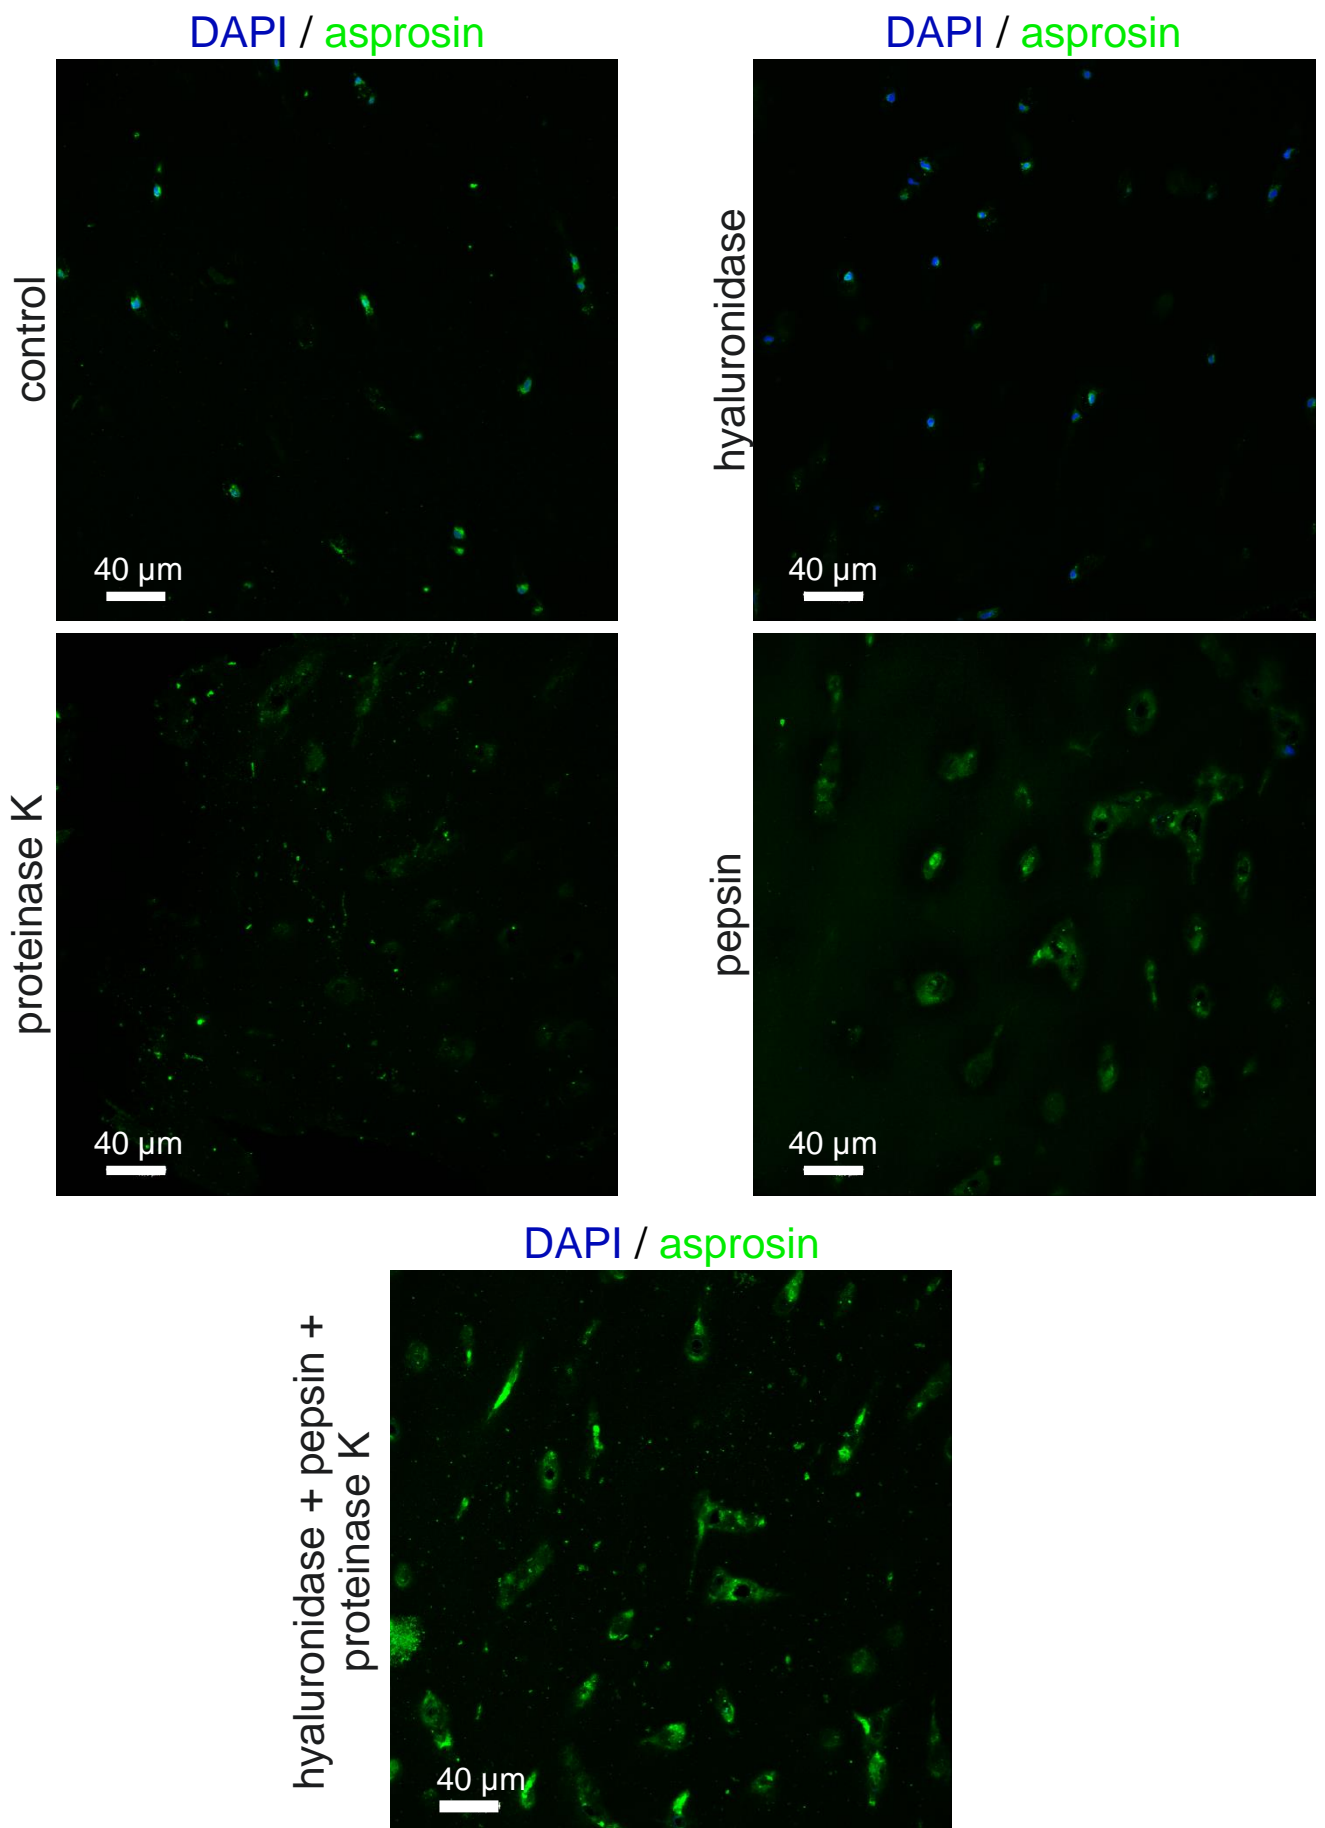

**Supplementary Figure S8: Effect of digestion by various enzymes on asprosin detection by immunostaining in human cartilage.**

Cartilage cryosections were treated (top, left) with acetone only, or additionally (top, right) digested with hyaluronidase, or (middle, left) with proteinase K, or (middle, right) with pepsin, or (bottom) with a mixture of all of these enzymes together. The signal of pc-asp asprosin was detected in green, DAPI nuclei staining in blue. Confocal images were obtained from a Leica SP8 confocal microscope and Leica LAS AF Lite 4.0 software. Images were further processed using Fiji/ImageJ software to obtain average Intensity Z-projection.



**Supplementary Table S1: Reported asprosin concentrations in clinical samples.** Shown data are from studies available on PubMed, search term “asprosin” until June 2<sup>nd</sup>, 2021.

| Year | first author | PMID     | range of detected asprosin                                                                                            | amounts (ng/ml) | sample        | BMI                                                                                    | age (years)                                                 | total number, sex (f/m)                  | asprosin detection kit                                                                                                                                                             | detection range                 | minimal amounts detectable | intra-assay CV | inter-assay CV |
|------|--------------|----------|-----------------------------------------------------------------------------------------------------------------------|-----------------|---------------|----------------------------------------------------------------------------------------|-------------------------------------------------------------|------------------------------------------|------------------------------------------------------------------------------------------------------------------------------------------------------------------------------------|---------------------------------|----------------------------|----------------|----------------|
| 2016 | Romere       | 27087445 | 5-12 nM (nonfasted- fasted); (nonobese- obese)                                                                        | 185-444         | plasma        | no information given                                                                   | no information given                                        | 23,                                      | capture: mouse mab anti-asprosin against aa 106–134 (human profibrillin aa 2838–2865), detector: polyclonal goat anti-asprosin aa 6–19 (human profibrillin aa 2737–2750) by Abnova |                                 |                            |                |                |
| 2017 | Zhang        | 29104036 | ctrls: 1.77 (1.24-3.45) ng/ml; diabetes type 2: 3.52 (1.50-7.17) ng/ml                                                | 1.77-7.17       | serum         | ctrls: 24.81 ± 3.91; T2DM: 25.25 ± 4.20                                                | 47.60 ± 7.9549.93 ± 10.99                                   | 170, 69/101                              | Human Asprosin ELISA Kit. Catalogue No: abx257694, Abbexa Ltd, Cambridge, UK                                                                                                       |                                 | <0.938 ng/ml               | <10%.          | <6%            |
| 2018 | Acara        | 29274804 | UAP: admission 7.84 ± 6.57 ng/ml; after 24h angiography: 9.21 ± 12.7 ng/ml                                            | 1.27-21.91      | serum         | no information                                                                         | 60.27 ± 10.67                                               | 22, 7/15                                 | Human Asprosin ELISA Kit. Catalogue No: abx257694, Abbexa Ltd, Cambridge, UK                                                                                                       |                                 |                            |                |                |
| 2018 | Wang         | 29743813 | ctrls: 16.22 ± 9.27 ng/mL; impaired glucose regulation: 82.40 ± 91.06 ng/mL; nT2D: 73.25 ± 91.69 ng/ml                | 6.95-173.46     | plasma        | ctrls: 22.76 ± 3.61, IGR: 23.86 ± 3.08, nT2DM: 24.73 ± 3.55                            | 63.62 - 66.63                                               | 143, 84/59                               | Human ELISA kit, Wuhan EIAab Science Co. Ltd., China                                                                                                                               |                                 |                            | <10%           | <12%           |
| 2018 | Li           | 30524197 | ctrls: 2-12; TD2: 5-25, PCOS: 7-17 ng/ml                                                                              | 2.0-17.0        | plasma        | ctrl: 22.68 ± 4.00, T2D: 24.98 ± 3.31, PCOS: 26.68 ± 5.66                              | ctrls: 37.02 ± 8.16, T2DM: 47.02 ± 4.92, PCOS: 22.68 ± 5.66 | 160, 160/0, ctrls:66, T2DM: 53, PCOS: 41 | Human Asprosin ELISA Kit. Catalogue No: abx257694, Abbexa Ltd, Cambridge, UK                                                                                                       | 1.563 -100 ng/mL                | <0.938 ng/mL               | <8%            | <10%           |
| 2018 | Wiecek       | 30618797 | 3.7 ± 0.7 nM (f) vs 6.33 ± 3.45 (m) nM                                                                                | 106-362         | plasma        | 23.71 ± 1.58                                                                           | 21.64 ± 1.22 and 22.64 ± 1.49                               | 20, 10/10                                | SK00229-06 (Aviscera Bioscience, Inc., United States)                                                                                                                              | 37 - 1197 ng/ml (1–32 nmol/L)   |                            | <8%            | <12%           |
| 2019 | Alan         | 30325247 | ctrls: 3.69 ± 1.22 ng/ml; PCOS: 6.41 ± 1.89 ng/ml                                                                     | 2.47-8.3        | serum         | ctrls: 26.64 ± 4.55, PCOS: 26.47 ± 4.44                                                | ctrls: 30.10 ± 6.69, PCOS: 30.30 ± 6.78                     | 156, 156/0                               | Human Asprosin ELISA Kit. Catalogue No: abx257694, Abbexa Ltd, Cambridge, UK                                                                                                       | 0.156 - 10 ng/ml                |                            | <6%            | <8%            |
| 2019 | Wang         | 30459402 | ctrls: 307 ± 832 ng/ml; obese: 2360 ± 5094 ng/ml                                                                      | 307-7454        | serum         | 25.3 ± 3.6 vs. 41.6 ± 6.3                                                              | ctrls: 18–71 obese: 20–63                                   | 174, 107/67, ctrls: 57, obese: 117       | capture: rabbit polyclonal antibody against asprosin aa 106-134 (Abcam, USA), detector: goat polyclonal antibody against asprosin aa 6–19 (Abnova, Taiwan)                         |                                 |                            |                |                |
| 2019 | Chang        | 31015585 | ctrls: 61.5 ± 7.09 ng/ml; PCOS with BMI>25: 71.04 ± 7.81 ng/ml                                                        | 54.41-78.85     | serum         | ctrl: 22.59 ± 0.36, PCOS: 25.23 ± 0.28                                                 | ctrls: 27.42 ± 0.37, PCOS: 25 ± 0.22                        | 600, 600/0, ctrls: 156, PCOS:444         | EIAab, Phoenix Pharmaceuticals, and Millipore Corporation                                                                                                                          |                                 |                            |                |                |
| 2019 | Ugur         | 31049060 | ctrls: 14.0 ± 3.75 ng/ml; overweight-obese: 60-130 ng/ml                                                              | 10.25-130       | serum, saliva | ctrl: 21.86 ± 1.96, underweight: 15.5 ± 0.71, overweight: 27.68 ± 1.2                  | 25-44                                                       | 116                                      | Shanghai sunredbio (SRB) Technology Co. Ltd, catalog no. 201-12-3287, Shanghai, China                                                                                              | 1-300 ng/mL                     | 0.756 ng/mL                | <10%           | <12%           |
| 2019 | Long         | 31212299 | ctrls: 12.33 ± 4.18 ng/ml, obese: 9.24 ± 4.11 ng/ml                                                                   | 4.03-14.39      | plasma        | ctrls: boys: 16.17±2.34, girls: 15.36±1.61; obese: boys: 24.77±2.33, girls: 20.80±4.99 | 8.0-11.0                                                    | 87, 38/49                                | Human ELISA Kit; Wuhan EIAab Science Co. Ltd., China                                                                                                                               |                                 |                            | <12%           | <10%           |
| 2019 | Baykus       | 31400492 | ctrls: 15.9-16.4 ng/ml, study group: 11.7-42.8 ng/ml                                                                  | 11.2-42.8       | serum         | 29.1-32.1                                                                              | 28.1-30.9                                                   | 179, 179/0                               | SUNRED BIOSCIENCE, catalogue #:201-12-5592, Shanghai,CHINA)                                                                                                                        | 0.25 - 70 ng/ml                 | 0.214 ng/ml                | <8%            | <12 %          |
| 2019 | Wiecek       | 31510055 | ctrls: 4.26 ± 2.05 nM; methabolic syndrome: 4.77 ± 5.17 nM                                                            | 82-372          | serum         | 25.15–29.23                                                                            | 55 - 70                                                     | 37, 37/0                                 | SK00229-09 (Aviscera Bioscience, Inc., Santa Clara, CA, USA                                                                                                                        |                                 |                            |                |                |
| 2019 | Groener      | 31536600 | T1D with and without hypoglycaemia unawareness: 60-280 ng/ml                                                          | 60-280          | plasma        | 24.4 (20.1–31.3) and 25.4 (21–38.9)                                                    | 29-75                                                       | 15, 7/8                                  | Human Asprosin (ASPRO) ELISA Kit, Wuhan Abebio Science Co., Ltd, Wuhan, China, Code: AE26043HU)                                                                                    | 37 - 1197 ng/ml (1 - 32 nmol/L) |                            |                |                |
| 2019 | Wang         | 31775140 | ctrls: 0.96 ± 0.48 ng/ml; obese: 1.51 ± 0.44 ng/ml                                                                    | 0.48-1.9        | serum         | ctrls: 15.67±2.30 vs.obese: 27.44±3.93                                                 | 8.6-13.1                                                    | 119, 43/76                               | USCN Life Science Inc., Wuhan, China                                                                                                                                               |                                 |                            | <10%           | <10%           |
| 2020 | Ke           | 33414826 | ctrls: 2.71 ± 0.86 ng/ml; agromegaly patients: 2.18 ± 0.86 ng/ml                                                      | 2.18-2.71       | serum         | ctrls: 26.44 ± 3.41, agromegaly: 25.79 ± 3.52                                          | ctrls: 44.5 ± 13.0, agromegaly: 41.3 ± 15.0                 | 189, agromegaly: 39/29, ctrls: 78/43     | USCN Life Science Inc., Wuhan, China, Article no. SEA332Hu                                                                                                                         |                                 |                            | <6.7%          | <12.9%         |
| 2020 | Zhang        | 31529619 | 5-6 ng/ml                                                                                                             | 5.0-6.0         | serum         | ctrls: 25.98 ± 2.73, T2D: 26.32 ± 3.41                                                 | ctrls: 54.62 ± 5.97; T2D: 56.40 ± 7.49                      | 120, 54/66                               | Human ELISA kit; Wuhan EIAab Science Co. Ltd., Wuhan, China                                                                                                                        |                                 |                            |                |                |
| 2020 | Silistre     | 32003085 | ctrls: 70.903 ± 17.49 ng/ml; overweight: 79.744 ± 29.54 ng/ml; obese: 106.293 ± 122.69 ng/ml                          | 53.41-186.03    | serum         | ctrls: 19.745 (7.82), overweight: 24.32 (10.49), obese: 29.585 (20.56)                 | 12.589 ± 2.42                                               | 158, 77/81                               | HumanAsprosin Elisa Kit, catalogue number: SG-15241 (SinogeneclonHang Zhou, China)                                                                                                 | 7.80 - 500 ng/ml                | 2.1 ng/ml                  | <8%            | <10%           |
| 2020 | Zhong        | 32090964 | ctrls: 0.5 (1.13) ng/ml; gestational diabetes mellitus (GDM): 1.35 (0.92) ng/ml                                       | 0.5-1.35        | plasma        | ctrls: 25.9 ± 2.48, GDM: 25.01 ± 5.28                                                  | 34.18 ± 3.24                                                | 80, 80/0                                 | Human Asprosin ELISA Kit. Catalogue No: abx257694, Abbexa Ltd, Cambridge, UK                                                                                                       |                                 | <0.938 ng/ml               | <10%.          | <8%            |
| 2020 | Zhang        | 32458209 | ctrls: 5.08 ± 1.31 ng/ml, non diabetic kidney disease (nDKD): 6.23 ± 0.87 ng/ml, DKD: 7.23 ± 0.94 ng/ml               | 3.77-8.17       | serum         |                                                                                        | 49.38 - 64.57                                               | 105, 52/53                               | Human ELISA kit, Wuhan EIAab Science Co. Ltd., China                                                                                                                               |                                 |                            |                |                |
| 2020 | Ke           | 32645536 | ctrls: 1.54 ± 0.47 ng/ml, NAFLD: 2.27 ± 1.05 ng/ml                                                                    | 1.07-3.32       | serum         | ctrls: 22.40 ± 2.99, NAFLD: 25.24 ± 2.68                                               | ctrls: 53.10 ± 12.64, NAFLD: 52.98 ± 14.88                  | 93                                       | Human Asprosin ELISA Kit. Catalogue No: abx257694, Abbexa Ltd, Cambridge, UK                                                                                                       |                                 | <0.938 ng/ml               | <10%.          | <6%            |
| 2020 | Naiemian     | 32714446 | ctrls: 3.50 (1.85) ng/ml, T2D: 4.18 (4.4) ng/ml                                                                       | 1.65-8.58       | serum         | ctrls: 26.66 (3.01), T2D: 27 (3.27)                                                    | 52-54                                                       | 194, 94/100, ctrls: 97, T2DM: 97         | Cat. No: CK-E91570; EASTBIOPHARM, China                                                                                                                                            |                                 |                            | <10%           | <12%           |
| 2020 | Ceylan       | 32741294 | morning ctrl: 0.70 ± 0.17 ng/ml, OW/OO: 0 .97 ± 0.26 ng/ml; evening ctrl: 0.66 ± 0.12 ng/ml, OW/OO: 0.97 ± 0.26 ng/ml | 0.53-1.17       | serum         | ctrls: 18.5–24.9, OW/OO: 25–29.9 or 30–39.9                                            | 30-45                                                       | 20, 0/20                                 | E-EL-H2266-Elabscience, Biotechnology                                                                                                                                              | 0.31 - 20 ng/ml                 |                            | <10%           |                |
| 2020 | Wen          | 32894050 | ctrls: 10-480 ng/ml, dilated cardiomyopathy: 50-220 ng/ml                                                             | 10-220          | serum         | 25.8-26.4                                                                              | 54-55                                                       | 50, 7/43                                 | capture antibody: mouse monoclonal anti-asprosin against: human profibrillin aa 2832–2871, detector: polyclonal goat anti-asprosin (human profibrillin aa 2737–2750) by Abnova     |                                 |                            |                |                |
| 2020 | Deng         | 32894050 | T2DM/Normoalbuminuria: 1.59(1.18–2.09) ng/ml, Microalb.: 2.10(1.60–2.90) ng/ml, Macroalb.: 2.37(1.63–3.57) ng/ml      | 1.18-3.57       | serum         | 24.22 ± 3.45, 24.93 ± 3.43, 25.81 ± 2.84                                               | 60.15 ± 10.56, 62.96 ± 10.87, 63.40 ± 10.51                 | 207, 44/63, 33/47, 10/10                 | Jiangsu, Feiya biological technology, Jiangsu, China; catalogue No. MM-1650H1                                                                                                      |                                 | 0.1 ng/ml                  | <10%           | <15%           |
| 2021 | Hu           | 32026376 | ctrls: 1947.0 ± 2143.8 pg/mL; anorexia nervosa: 2514.8 ± 1957.2 pg/mL                                                 | 0-4.47          | plasma        | ctrls: 19.0 ± 1.7, anorexia nervosa: 15.0 ± 2.0                                        | ctrls: 18.7 ± 2.2, anorexia nervosa: 18.7 ± 2.2             | 46, 46/0                                 | Asprosin (human) Matched Pair Detection Set (catalog number AG-46B-0011-K101) pur-chased from Adipogen Ltd., San Diego, USA                                                        | 0 - 5 ng/ml                     |                            | <5%            | <7%.           |
| 2021 | Deniz        | 32608281 | ctrls: 9 ± 2, PCOS: 28 ± 4 ng/ml                                                                                      | 7.0-32.0        | plasma        | ctrls: 23.99 ± 4.2, PCOS: 24.77 ± 4.12                                                 | ctrls: 28.22 ± 2.6, PCOS: 27.14 ± 3.21                      | 60, 0/60 (ctrls:30; PCOS: 30)            | Human Asprosin ELISA Kit Bioassay TechnologyLaboratory, Catalogue no: E4095Hu Shanghai, CHIN                                                                                       | 0.5 - 100 ng/ml                 | 0.23 ng/ml                 | <8%            | <10 %          |
| 2021 | Du           | 32661697 | ctrls: 1-18 ng/ml, cachexia, anorexia, post-operation: 1-25 ng/ml                                                     | 1.0-25.0        | plasma        | 22.7 (3.4)                                                                             | <65: 83, >65: 37                                            | 120, 24/96                               | abx555449, AbbexaBiotech, UK                                                                                                                                                       |                                 |                            |                |                |
| 2021 | Leonard      | 33289860 | oral contraceptive : 0.75 ± 0.38, non-OC: 1.00 ± 0.37 ng/ml                                                           | 0.37-1.37       | plasma        | 22.3 ± 2.8, 21.9 ± 1.9, 21.9 ± 2.7, 22.2 ± 2.4                                         | 24 ± 3, 27 ± 5, 24 ± 2, 25 ± 5                              | 32, 32/0                                 | Human Asprosin ELISA Kit. Catalogue No: abx257694, Abbexa Ltd, Cambridge, UK                                                                                                       |                                 |                            |                |                |
| 2021 | Hoseini      | 33352518 | 30.8 (23.8 – 48.0) ng/ml                                                                                              | 23.8 - 48.0     | serum         | 23.83 ± 8.06                                                                           | 27.6+ -5.6                                                  | 759, 759/0                               | EASTBIOPHARM, China                                                                                                                                                                |                                 | 0.34 ng/ ml                | <10%           | <12%           |
| 2021 | Jiang        | 33766125 | placebo ctrl: 33.43 (19.64, 49.94), SGLT2 inhibitor: 36.88 (24.81, 69.04)                                             | 19.64-69.04     | serum         | placebo: 25.64 ± 1.41, SGLT2 inhibitor: 26.60 ± 1.32                                   | placebo: 59.3 ± 9.03, SGLT2 inhibitor: 58.32 ± 8.01         | 31, placebo: 8/2, SGLT2: 11/9            | Eiaab Science INC. Wuhan, China (Catalogue Numbers, E15190h)                                                                                                                       | 1.563 ng/ml to 100 ng/ml        | 0.938 ng/ml                | <6.6%          | <7.6%          |
| 2021 | Hong         | 33747078 | ctrls: 16.70 [12.87, 22.38] ng/mL, metabolic syndrome: 23.52 [16.70, 32.05] ng/mL                                     | 12.87-32.05     | serum         | ctrls: 23.28 ± 2.49, MetS: 25.52 ± 3.02                                                | ctrls: 49.47 ± 9.16, MetS: 50.90 ± 9.45                     | 295, ctrl: 84/78, MetS: 66/65            | Human Asprosin ELISA Kit. Catalogue No: abx257694, Abbexa Ltd, Cambridge, UK                                                                                                       |                                 |                            |                |                |
| 2021 | Corica       | 33662891 | ctrls: 358.1 ± 74.1 pg/ml, obese: 331.9 ± 120.5 pg/ml                                                                 | 0.28-0.45       | serum         | obese vs lean                                                                          | children                                                    | no information given                     | no information given                                                                                                                                                               |                                 |                            |                |                |

**Abbreviations**  
aa: amino acid, BMI: body mass index, ctrls: controls, CV: coefficient of variation, OO: obese overweight, OW: overweight, PCOS: polycystic ovary syndrome, MetS: metabolic syndrome, NAFLD: non-alcoholic fatty liver disease, T1(2)D: type 1 (2) diabetes, UAP: unstable angina pectoris

**Supplementary Table S2: N-linked glycans expressed on recombinant asprosin expressed in HEK293 cells. MALDI mass spectrometric analysis of methylated glycans.**

| <b>M+Na (experimental)</b> | <b>Structural assignment</b> | <b>Antennarity* -</b> |
|----------------------------|------------------------------|-----------------------|
| 1579.74                    | H5N2 (M5)                    |                       |
| 1783.84                    | H6N2 (M6)                    |                       |
| 1835.88                    | F1H3N4                       | 2                     |
| 1987.92                    | H7N2 (M7)                    |                       |
| 2039.96                    | F1H4N4                       | 2                     |
| 2080.99                    | F1H3N5                       | 2                     |
| 2192.01                    | H8N2 (M8)                    |                       |
| 2244.05                    | F1H5N4                       | 2                     |
| 2285.08                    | F1H4N5                       | 3                     |
| 2489.17                    | F1H5N5                       | 3                     |
| 2605.21                    | S1F1H5N4                     | 2                     |
| 2646.23                    | S1F1H4N5                     | 3                     |
| 2693.25                    | F1H6N5                       | 3                     |
| 2734.27                    | F1H5N6                       | 4                     |
| 2850.32                    | S1F1H5N5                     | 3                     |
| 2938.37                    | F1H6N6                       | 4                     |
| 3054.41                    | S1F1H6N5                     | 3                     |
| 3299.53                    | S1F1H6N6                     | 4                     |
| 3415.58                    | S2F1H6N5                     | 3                     |
| 3503.63                    | S1F1H7N6                     | 4                     |
| 3864.83                    | S2F1H7N6                     | 4                     |
| 4226.04                    | S3F1H7N6                     | 4                     |
| 4588.31                    | S4F1H7N6                     | 4                     |

\*Antennarity is defined only for complex-type N-glycans. Structural assignments refer to monosaccharide compositions in terms of S, N-acetylneuraminic acid; F, fucose; H, hexose; and N, N-acetylhexosamine.

**Supplementary Table S3: Peptides of de-N-glycosylated asprosin after double digestion with trypsin and V8.**

1 STNETDASNI EDQSETEANV SLASWDVEKT AIFAFNISHV SNKVRILELL PALTTLTNHN RYLIESGNEG GFFKINQKEG  
 81 ISYLFHTKKK PVAGTYSLQI SSTPLYKKKE LNQLEDKYDK DYLSGELGDN LKMKIQVLLH

| Detected | m/z<br>(mi)      | m/z<br>(av) | Modifications | Start | End | Missed<br>Cleavages | Sequence                         | N-glycosylation site |
|----------|------------------|-------------|---------------|-------|-----|---------------------|----------------------------------|----------------------|
| 0        | 450.1831         | 450.4278    |               | 1     | 4   | 0                   | (-)STNE(T)                       | N3                   |
| 1        | 708.2683         | 708.6602    |               | 12    | 17  | 1                   | (E)DQSETE(A)                     |                      |
| 1        | 1065.5728        | 1066.2526   |               | 80    | 88  | 0                   | (E)GISYLFHTK(K)                  |                      |
| 0        | 1180.4964        | 1181.1618   |               | 1     | 11  | 1                   | (-)STNETDASNIE(D)                | N3                   |
| 0        | 1190.5688        | 1191.2906   |               | 18    | 28  | 0                   | (E)ANVSLASWDVE(K)                | N19                  |
| 1        | 1193.6677        | 1194.4278   |               | 80    | 89  | 1                   | (E)GISYLFHTKK(K)                 |                      |
| 1        | 1194.6154        | 1195.3688   |               | 79    | 88  | 1                   | (K)EGISYLFHTK(K)                 |                      |
| 1        | <b>1318.6638</b> | 1319.4658   | +1            | 18    | 29  | 1                   | (E)ANVSLASWDVEK(T)               | N19                  |
| 0        | <b>1420.6591</b> | 1421.5125   |               | 16    | 28  | 1                   | (E)TEANVSLASWDVE(K)              | N19                  |
| 1        | 1463.8329        | 1464.7182   |               | 49    | 61  | 0                   | (E)LLPALTTLTNHNRY(Y)             |                      |
| 1        | <b>1548.7540</b> | 1549.6877   | +1            | 16    | 29  | 2                   | (E)TEANVSLASWDVEK(T)             | N19                  |
| 1        | <b>1548.8169</b> | 1549.7806   | +1            | 30    | 43  | 0                   | (K)TAIFAFNISHVSNK(V)             | N36                  |
| 1        | <b>1639.6566</b> | 1640.5774   | +1            | 1     | 15  | 2                   | (-)STNETDASNIEDQSE(T)            | N3                   |
| 0        | <b>1676.9119</b> | 1677.9558   |               | 29    | 43  | 1                   | (E)KTAIFAFNISHVSNK(V)            | N36                  |
| 0        | <b>1803.9864</b> | 1805.1027   |               | 30    | 45  | 1                   | (K)TAIFAFNISHVSNKVR(I)           | N36                  |
| 1        | <b>1869.7468</b> | 1870.7993   | +1            | 1     | 17  | 3                   | (-)STNETDASNIEDQSETE(A)          | N3                   |
| 0        | <b>1879.8192</b> | 1880.9281   |               | 12    | 28  | 2                   | (E)DQSETEANVSLASWDVE(K)          | N19                  |
| 0        | <b>1932.0814</b> | 1933.2779   |               | 29    | 45  | 2                   | (E)KTAIFAFNISHVSNKVR(I)          | N36                  |
| 0        | <b>2007.9142</b> | 2009.1033   |               | 12    | 29  | 3                   | (E)DQSETEANVSLASWDVEK(T)         | N19                  |
| 0        | <b>2159.1971</b> | 2160.5398   |               | 30    | 48  | 2                   | (K)TAIFAFNISHVSNKVRILE(L)        | N36                  |
| 0        | <b>2287.2921</b> | 2288.7150   |               | 29    | 48  | 3                   | (E)KTAIFAFNISHVSNKVRILE(L)       | N36                  |
| 0        | <b>2610.1326</b> | 2611.6621   |               | 5     | 28  | 3                   | (E)TDASNIEDQSETEANVSLASWDVE(K)   | N19                  |
| 0        | <b>2848.4628</b> | 2850.2236   |               | 18    | 43  | 2                   | (E)ANVSLASWDVEKTAIFAFNISHVSNK(V) | N19, N36             |

**Supplementary Table S4: Serum asprosin concentrations (mean  $\pm$  SD) before (t0) and after (t1 – t4) treadmill exercise (n = 15 subjects).**

| time points<br>(min) | asprosin<br>(ng/ml) | 95 % confidence interval |             |
|----------------------|---------------------|--------------------------|-------------|
|                      |                     | lower limit              | upper limit |
| t0 (0)               | 11.8 $\pm$ 6.2      | 8.4                      | 15.2        |
| t1 (30)              | 13.7 $\pm$ 6.5 (*)  | 10.1                     | 17.4        |
| t2 (60)              | 13 $\pm$ 7.1        | 9.1                      | 16.9        |
| t3 (90)              | 13.1 $\pm$ 6.5      | 9.5                      | 16.6        |
| t4 (120)             | 13.3 $\pm$ 7.6      | 9.1                      | 17.5        |

\*P = 0.0385

**Supplementary Table S5: Serum asprosin concentrations (mean  $\pm$  SD before (t0) and after (t1 - t3) total hip replacement (THR) surgery (n = 14 patients).**

| time points<br>(d) | asprosin (ng/ml)     | 95% confidence interval |             |
|--------------------|----------------------|-------------------------|-------------|
|                    |                      | lower limit             | upper limit |
| t0 (0)             | 21.0 $\pm$ 9.0       | 15.8                    | 26.2        |
| t1 (7)             | 14.8 $\pm$ 6.5 (***) | 11.1                    | 18.6        |
| t2 (90)            | 19.1 $\pm$ 8.1       | 14.4                    | 23.7        |
| t3 (365)           | 16.8 $\pm$ 7.5       | 12.5                    | 21.2        |

\*\*\*P = 0.0003

**Supplementary Table S6: Serum COMP concentrations (mean  $\pm$  SD) before (t0) and after (t1 - t3) total hip replacement (THR) surgery (n = 14 patients).**

| time points | COMP (ng/ml)           | 95% confidence interval |             |
|-------------|------------------------|-------------------------|-------------|
|             |                        | lower limit             | upper limit |
| t0          | 707.0 $\pm$ 171.0      | 608.3                   | 805.7       |
| t1          | 467.1 $\pm$ 124.1 (**) | 395.4                   | 538.8       |
| t2          | 783.7 $\pm$ 286.2      | 618.5                   | 949.0       |
| t3          | 737.1 $\pm$ 216.0      | 612.4                   | 861.7       |

\*\*P = 0.0056



**Supplementary Table S7: Anthropometric measures of the two analyzed cohorts in this study.**

| cohort                              | f/m  | age (years) | height (m)  | weight (kg) | BMI (kg/m <sup>2</sup> ) |
|-------------------------------------|------|-------------|-------------|-------------|--------------------------|
| treadmill exercise                  | 0/15 | 27.5 ± 3.1  | 1.8 ± 0.05  | 78 ± 7.7    | 23.9 ± 1.9               |
| total hip replacement (THR) surgery | 7/7  | 61.4 ± 10.5 | 1.74 ± 0.07 | 79.7 ± 16.4 | 26.2 ± 4.7               |

# Original gels and western blots

Markers were purchased from Thermo Fisher Scientific:

- 1- PageRuler Prestained Protein Ladder, 10 to 180 kDa (#26616)
- 2- PageRuler Plus Prestained Protein Ladder, 10 to 250 kDa (#26620)
- 3- Spectra Multicolor High Range Protein Ladder, 40 to 300 kDa (#26625)

Blot/gel images were arranged and edited for figure preparation using Microsoft PowerPoint 2016

| Figure     | percentage (%) SDS-PAGE gel | running condition | method of analysis | used antibody               |
|------------|-----------------------------|-------------------|--------------------|-----------------------------|
| 1B         | 12                          | reducing          | Coomassie          | -                           |
| 1D         | 10                          | reducing          | Coomassie          | -                           |
| 1F(left)   | 10                          | reducing          | WB                 | pc-asp                      |
| 1F(middle) | 7.5                         | non-reducing      | WB                 | fibrillin-1 (rF90)*         |
| 1F(right)  | 7.5                         | non-reducing      | WB                 | CPTC-FBN1-3*                |
| 1G         | 10                          | reducing          | WB                 | pc-asp                      |
| 3B(left)   | 10                          | reducing          | Coomassie          | -                           |
| 3B(right)  | 10                          | reducing          | WB                 | mab anti-asprosin (Birdy-1) |
| 3C         | 10                          | reducing          | WB                 | mab anti-asprosin (Birdy-1) |
| 4A         | 7.5                         | non-reducing      | WB                 | fibrillin-1 (rF90)*         |
| S5D        | 10                          | reducing          | WB                 | pc-asp                      |
| S5F        | 10                          | reducing          | Coomassie          | -                           |
| S5I        | 10                          | reducing          | WB                 | mab anti-asprosin (Birdy-1) |

\*non-reducing condition was chosen, since antibodies recognize folded epitopes.

Figure 1B

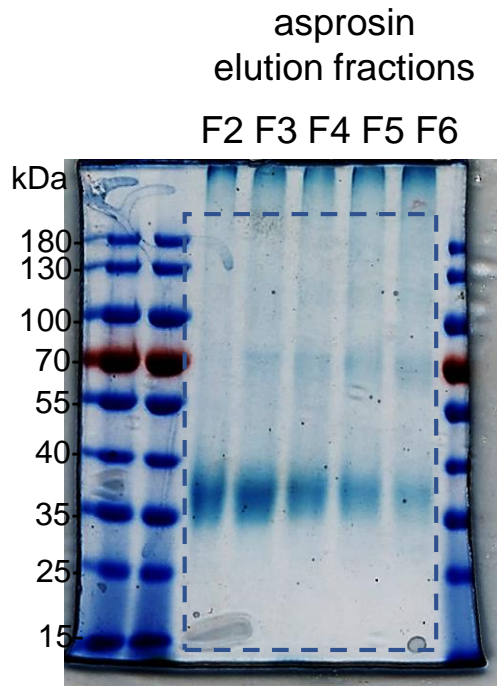

Figure 1D

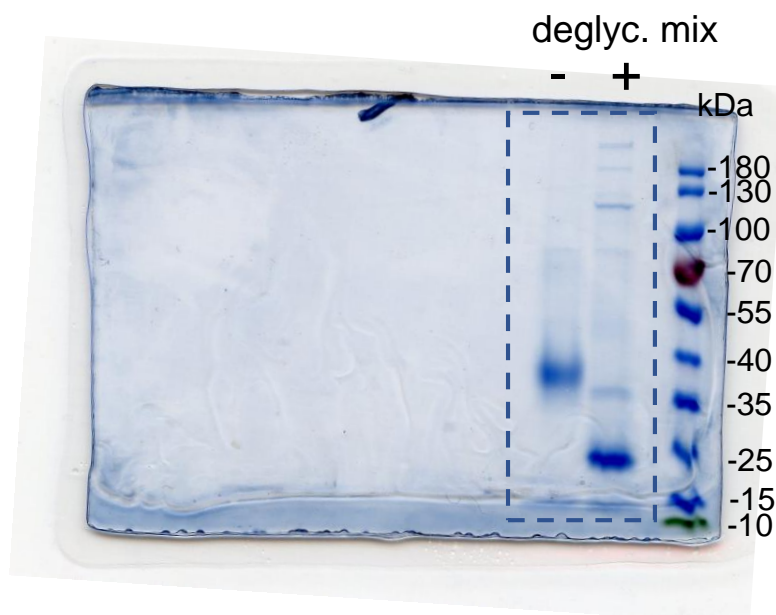

Figure 1F

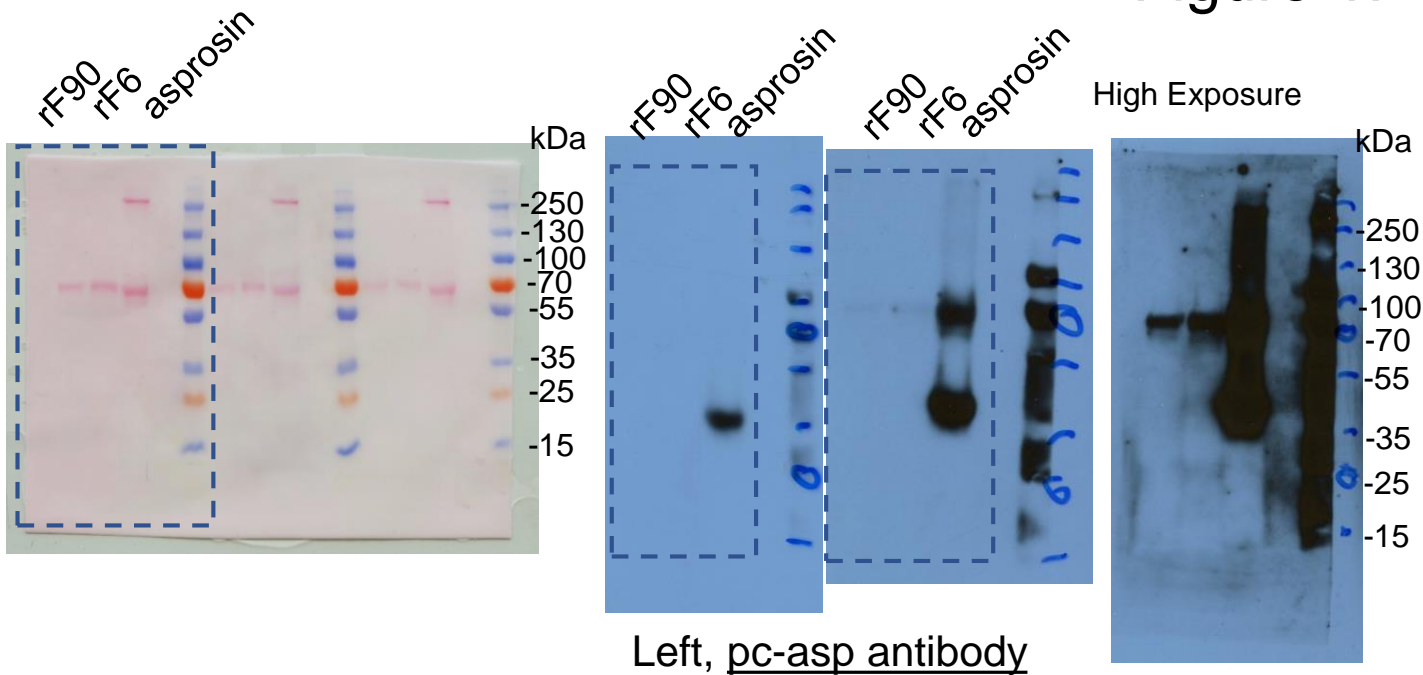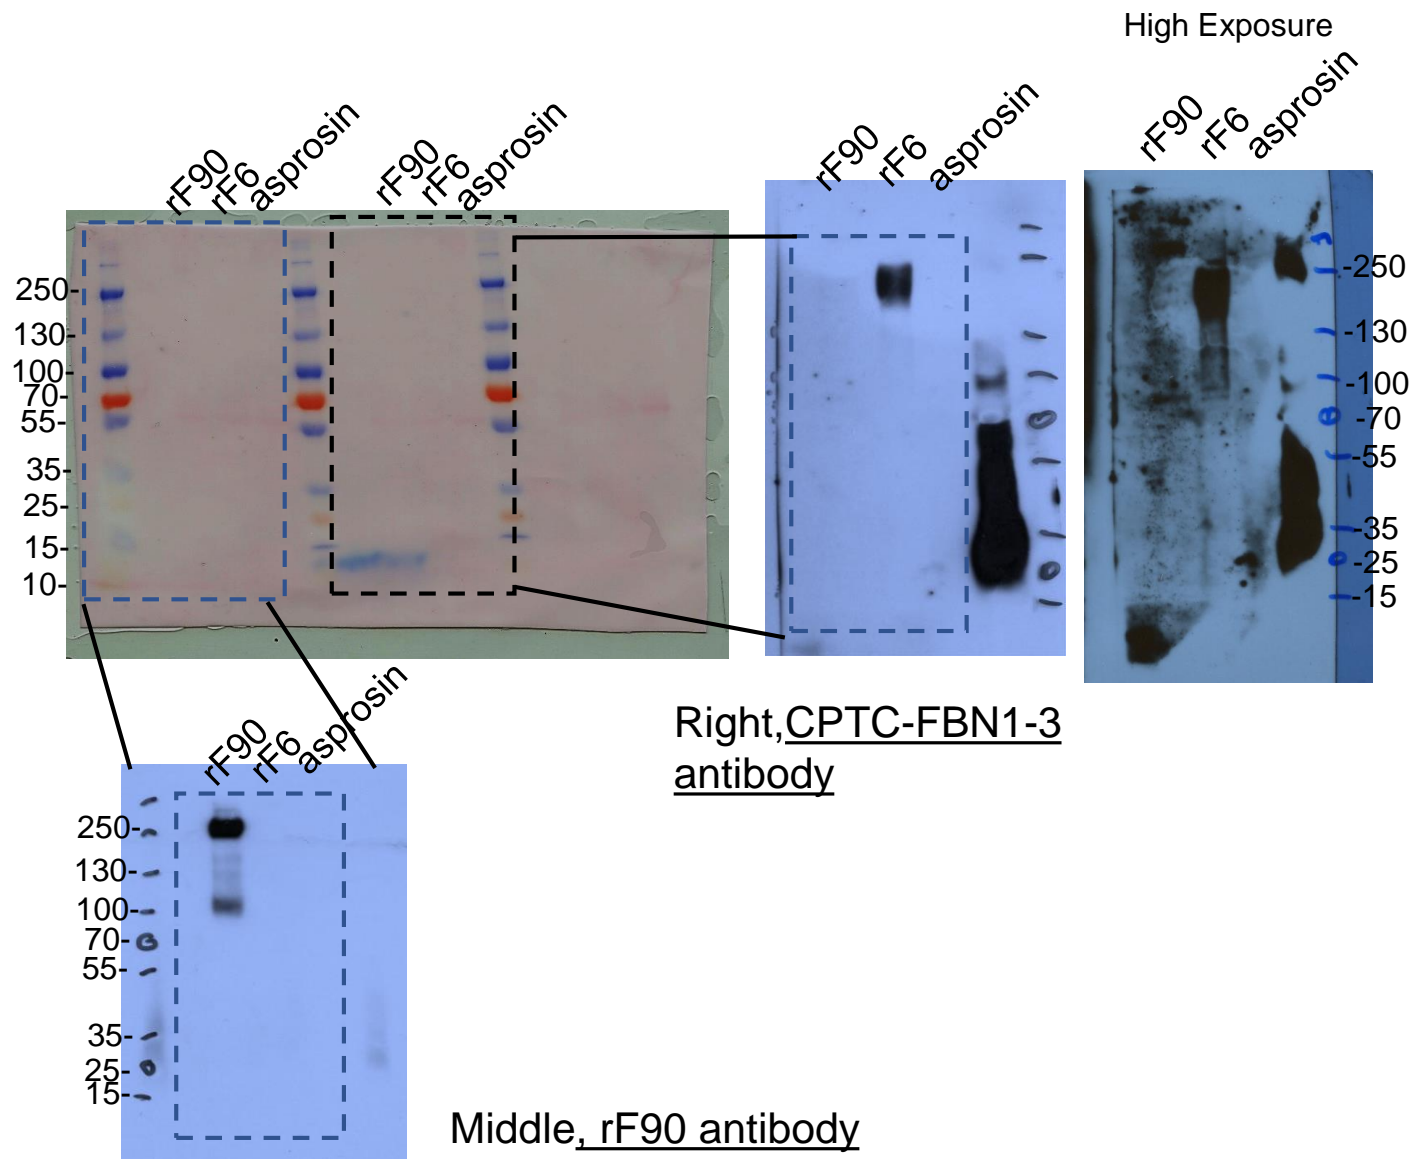

Figure 1G

deglyc. mix

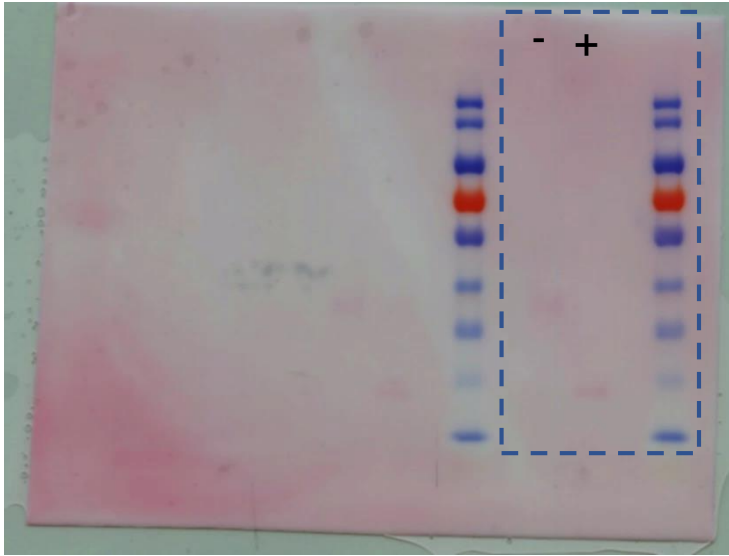

deglyc. mix

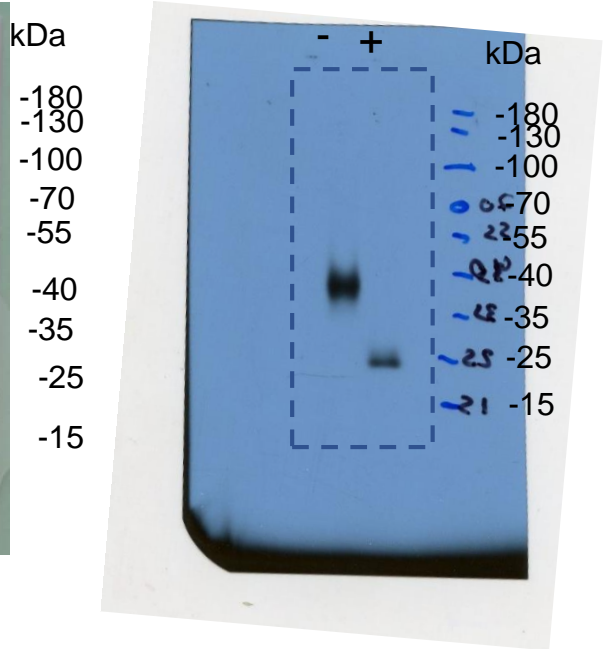

High Exposure

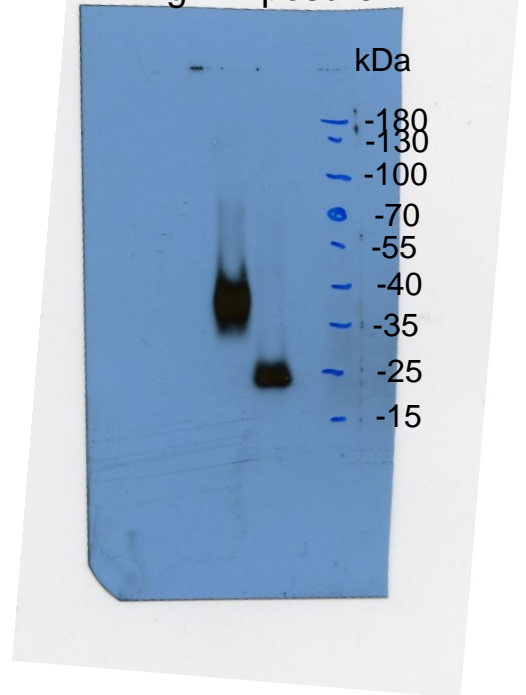

Figure 3B

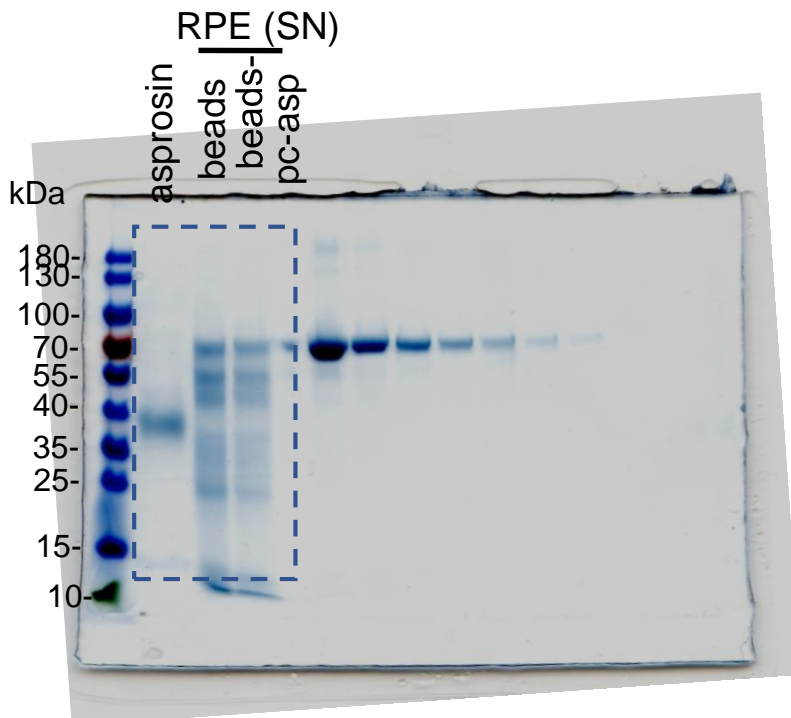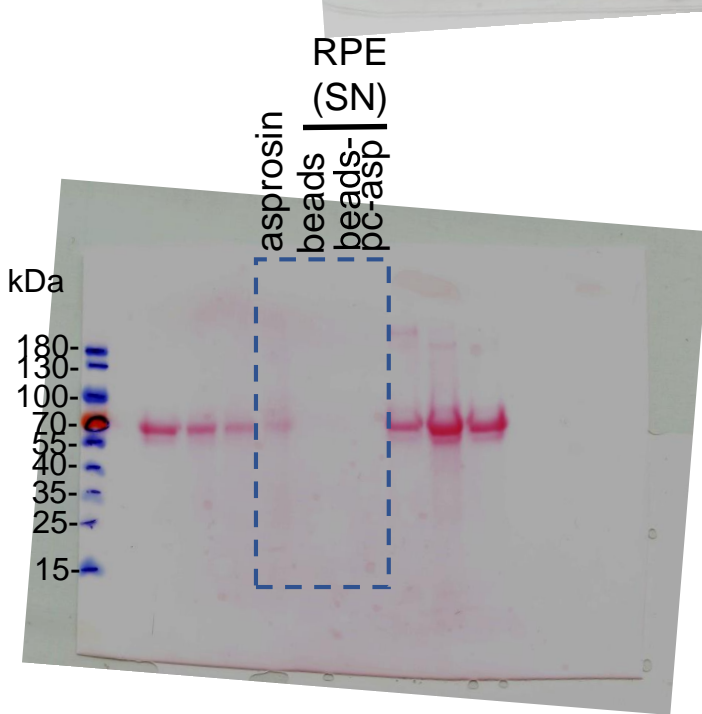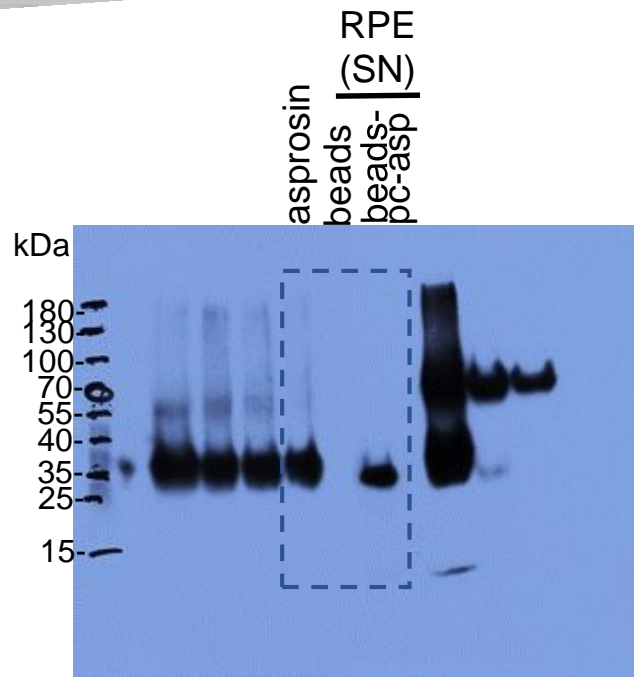

Figure 3C

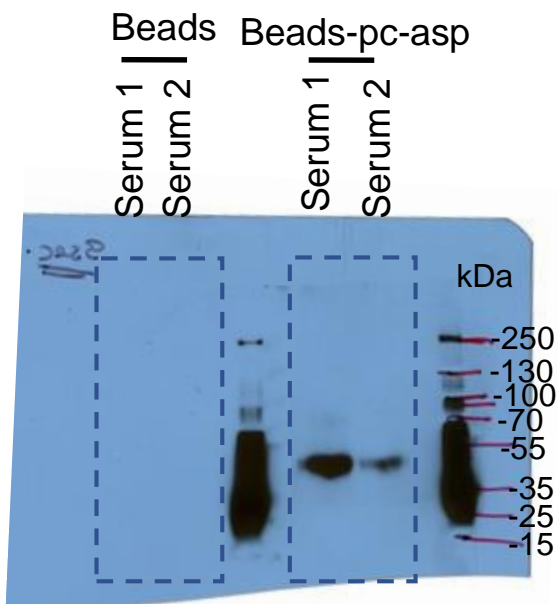

High Exposure

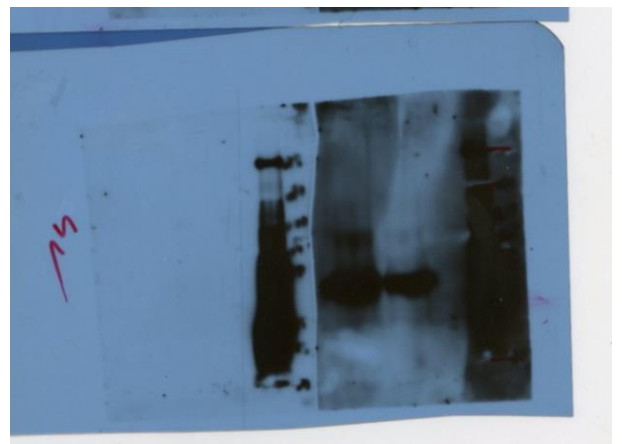



Figure 4A

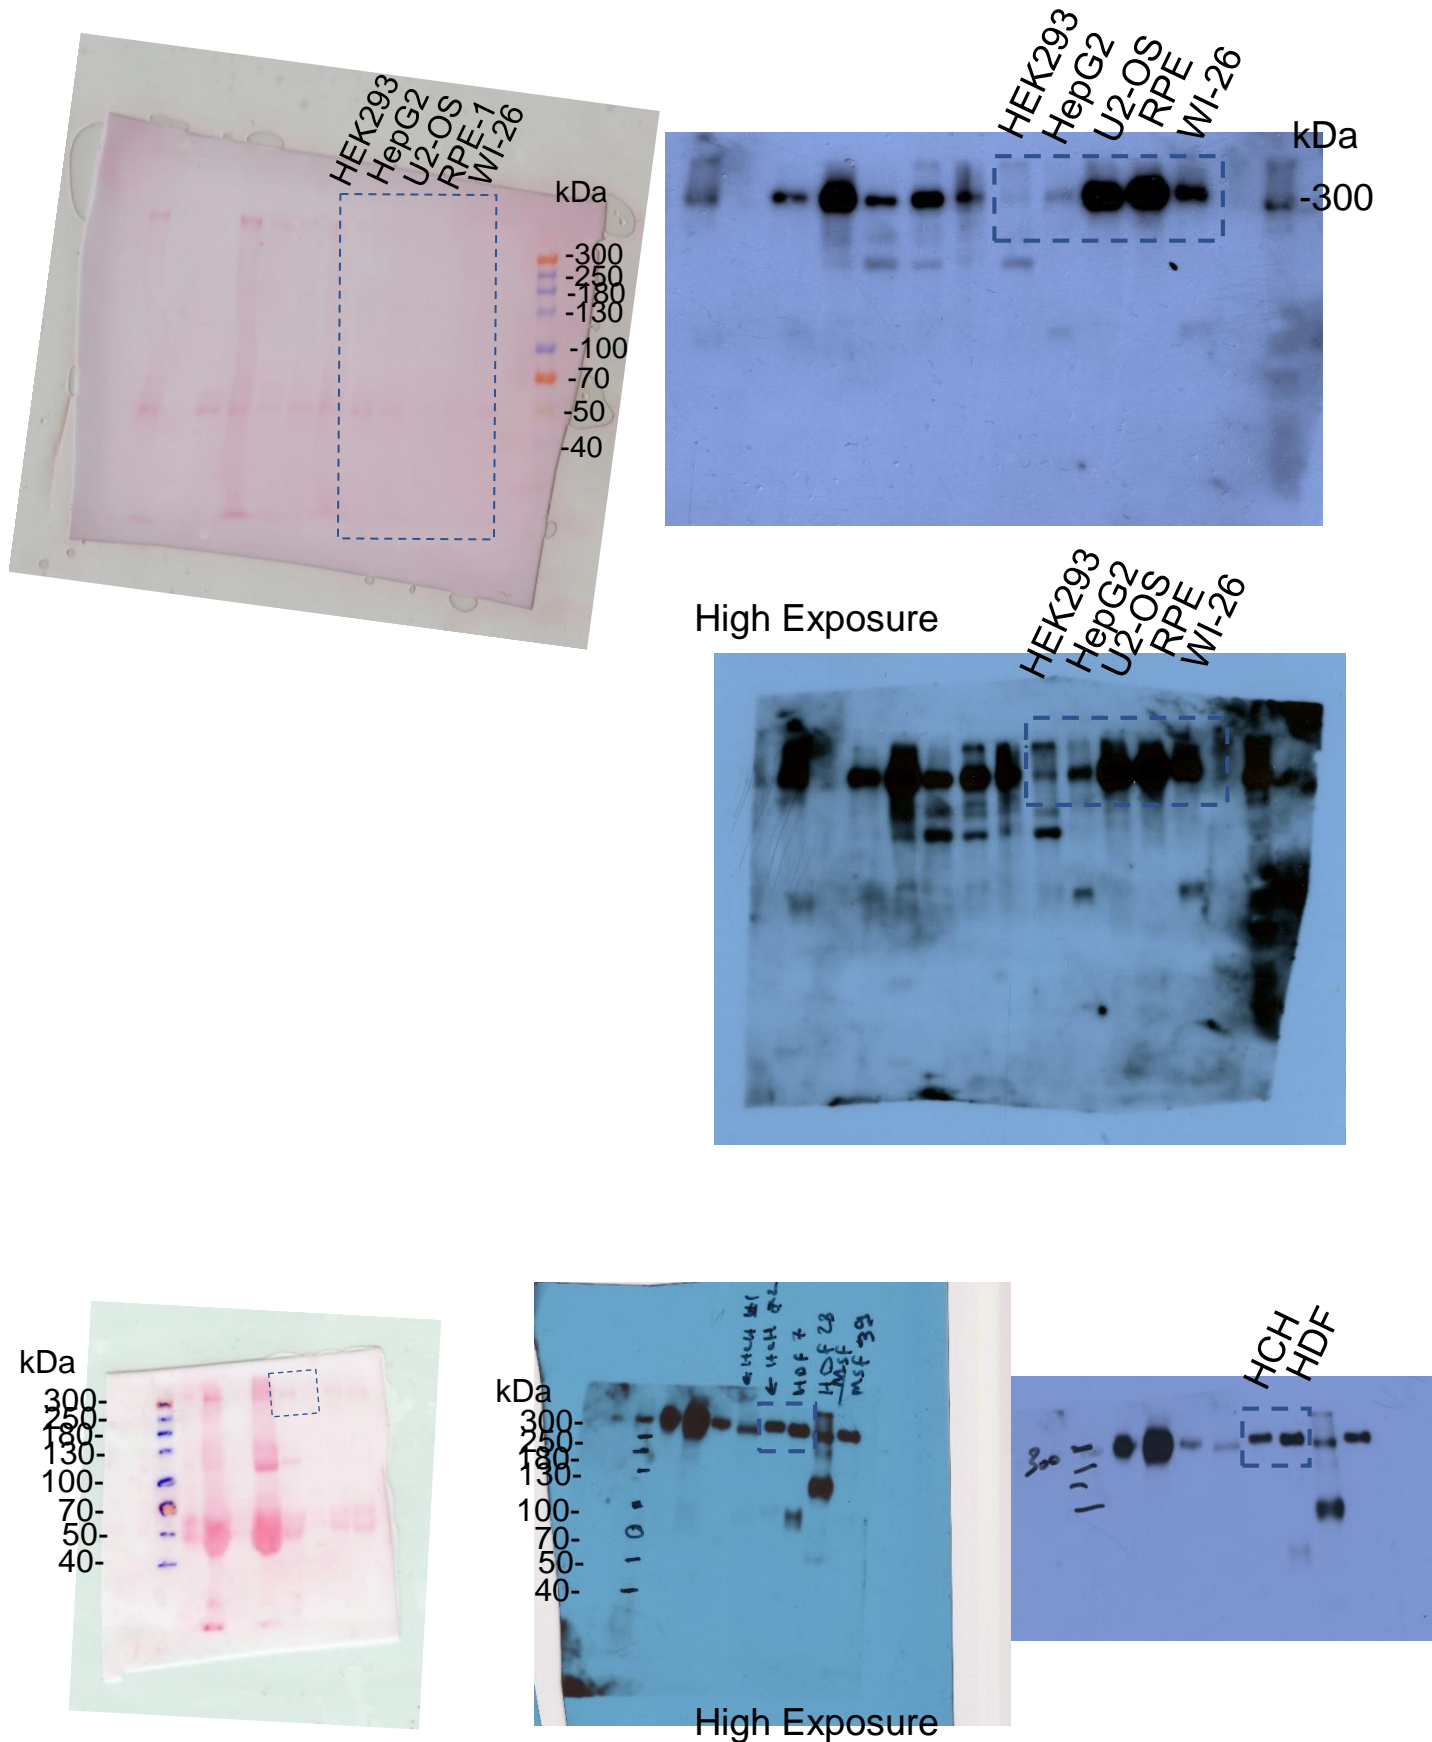

Figure S5D

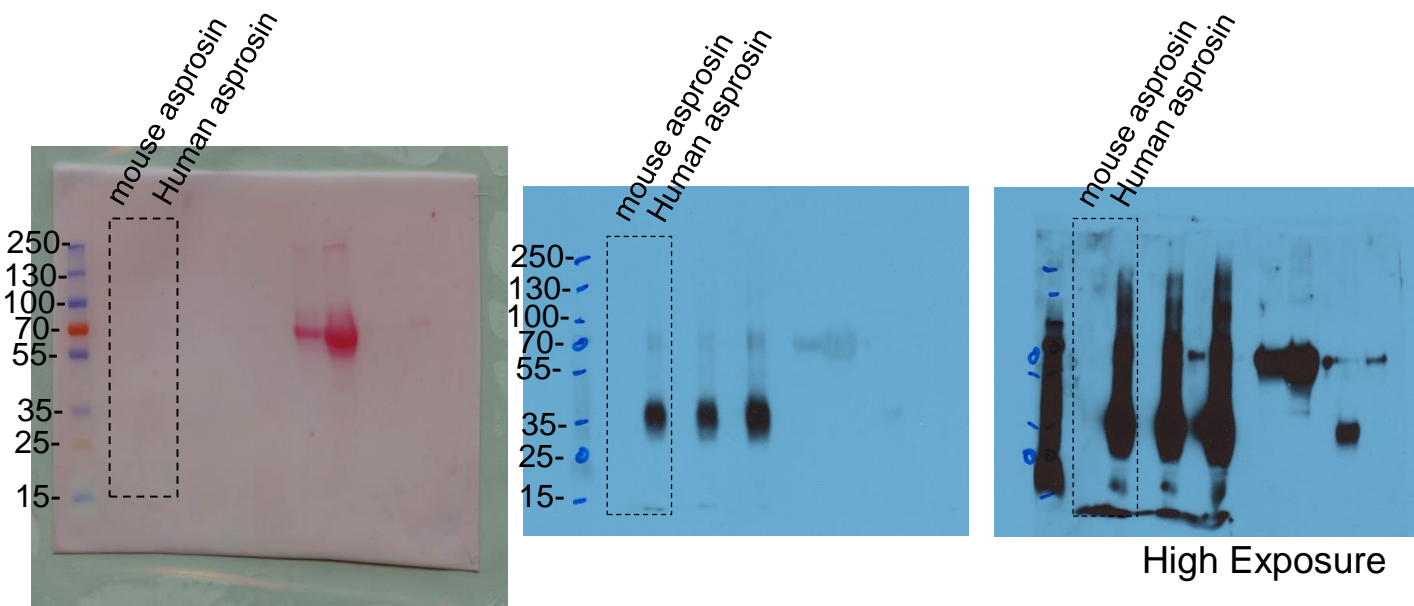

Placensin  
elution fractions

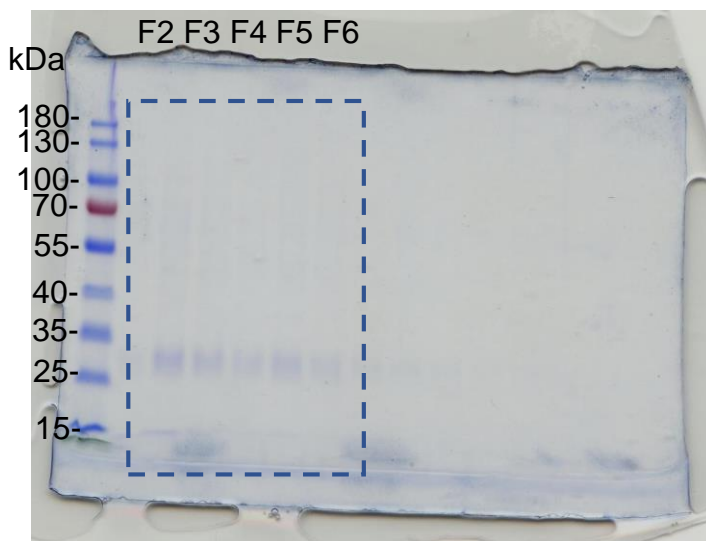

Figure S5F

deglyc. mix

- +

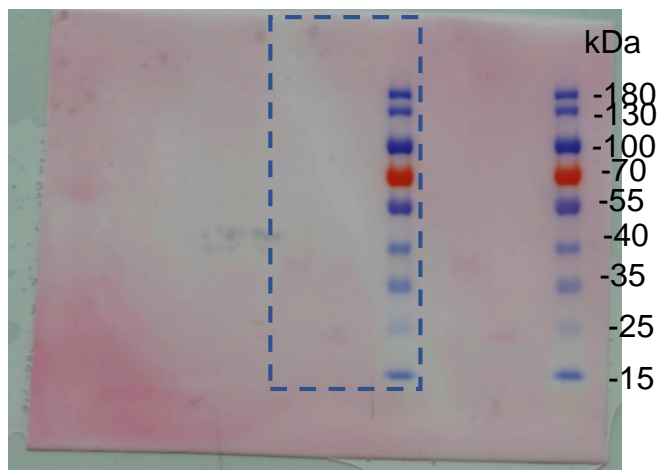

deglyc. mix

- +

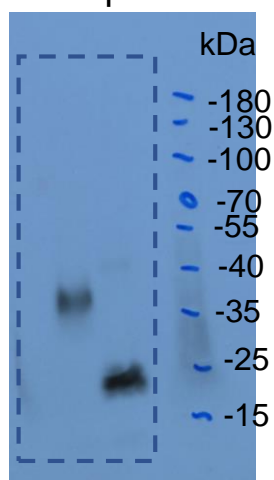

Figure S5I

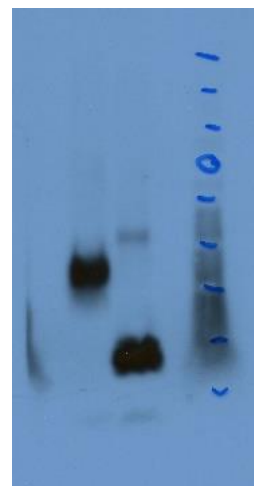

Supplement: 41598_2022_5060_MOESM1_ESM.pdf [file 41598_2022_5060_MOESM1_ESM.pdf]
